# Supplementary material for: Turning Up the Heat on a Hotspot: DNA Barcodes Reveal 80% More Species of Geometrid Moths along an Andean Elevational Gradient
Source: PLoS One. 2016 Mar 9;11(3):e0150327. doi: 10.1371/journal.pone.0150327 (PMC4784734; doi:10.1371/journal.pone.0150327)
Supplement: S1 Table — Sheet 1: All sites (first and second studies) with coordinates and elevation, sheet 2: first study: species-site matrix, sheet 3: second study: species-site matrix, sheet 4: diversity measures. (XLSX) [file pone.0150327.s001.xlsx]

## Sheet: All sites
Site Nr	Dissertation Brehm	Area	Latitude (S)	Longitude (W)	Elevation (m)	Lat (S)	Long (W)	Years
1	3a	Reserva Biologica San Francisco	3°58.45' S	79°04.73' W	1800 m	-3.974167	-79.078833	1999-2011																							1	4.73	58.45
2	4b	Reserva Biologica San Francisco	3°58.43' S	79°04.66' W	1875 m	-3.973833	-79.077667	1999-2000																							2	4.66	58.43
3	5a	Reserva Biologica San Francisco	3°58.78' S	79°05.08' W	2005 m	-3.979667	-79.084667	1999-2000																							3	5.06	58.71
4	6a	Reserva Biologica San Francisco	3°58.85' S	79°05.01' W	2070 m	-3.980833	-79.0835	1999-2000																							4	5.01	58.85
5	7b	Reserva Biologica San Francisco	3°58.94' S	79°04.84' W	2212 m	-3.982333	-79.080667	1999-2013																							5	4.84	58.94
6	8b	Reserva Biologica San Francisco	3°59.03' S	79°04.68' W	2308 m	-3.983833	-79.078	1999-2000																							6	4.68	59.03
7	9a	Reserva Biologica San Francisco	3°59.15' S	79°04.56' W	2375 m	-3.985833	-79.076	1999-2000																							7	4.56	59.15
8	3b	Reserva Biologica San Francisco	3°58.38' S	79°04.71' W	1800 m	-3.973	-79.0785	1999-2011																							8	4.71	58.38
9	4a	Reserva Biologica San Francisco	3°58.38' S	79°04.66' W	1850 m	-3.973	-79.077667	1999-2000																							9	4.66	58.38
10	5b	Reserva Biologica San Francisco	3°58.43' S	79°04.50' W	2005 m	-3.973833	-79.075	1999-2000																							10	4.5	58.43
11	6b	Reserva Biologica San Francisco	3°58.52' S	79°04.46' W	2113 m	-3.975333	-79.074333	1999-2000																							11	4.46	58.52
12	7a	Reserva Biologica San Francisco	3°58.72' S	79°04.44' W	2180 m	-3.978667	-79.074	1999-2013																							12	4.44	58.72
13	8a	Reserva Biologica San Francisco	3°58.96' S	79°04.41' W	2290 m	-3.982667	-79.0735	1999-2000																							13	4.41	58.96
14	9b	Reserva Biologica San Francisco	3°59.17' S	79°04.40' W	2387 m	-3.986167	-79.073333	1999-2000																							14	4.4	59.17
15	10a	Reserva Biologica San Francisco	3°59.52' S	79°04.30' W	2542 m	-3.992	-79.071667	1999-2000																							15	4.3	59.52
16	10b	Reserva Biologica San Francisco	3°59.56' S	79°04.26' W	2558 m	-3.992667	-79.071	1999-2000																							16	4.26	59.56
17	11a	Reserva Biologica San Francisco	3°59.65' S	79°04.10' W	2671 m	-3.994167	-79.068333	2000-2011																							17	4.1	59.65
18	11b	Reserva Biologica San Francisco	3°59.68' S	79°04.10' W	2677 m	-3.994667	-79.068333	2000-2011																							18	4.1	59.68
19	1a	Parque Nacional Podocarpus, Bombuscaro	4°06.87' S	78°58.03' W	1020 m	-4.1145	-78.967167	1999-2013																							19
20	1b	Parque Nacional Podocarpus, Bombuscaro	4°06.99' S	78°58.09' W	1025 m	-4.1165	-78.968167	1999-2013																							20
21	2a	Old road Loja-Zamora	4°01.11' S	79°00.95' W	1380 m	-4.0185	-79.015833	2000																							21
22	2b	Old road Loja-Zamora	4°01.11' S	79°00.95' W	1380 m	-4.0185	-79.015833	2000																							22
23	D2	Vicinty Reserva Biologica San Francisco	3°58.13' S	79°04.68' W	2005 m	-3.968833	-79.078	2000																							23	4.68	58.13
24	D1	Vicinty Reserva Biologica San Francisco	3°58.37' S	79°04.88' W	1950 m	-3.972833	-79.081333	2000																							24	4.88	58.37
29		Parque Nacional Podocarpus, Bombuscaro	4°07.00' S	78°58.09' W	1025 m	-4.116667	-78.968167	2011-2013																							29
30		Reserva Biologica San Francisco	03°58.54' S	79°04.56' W	2010 m	-3.975667	-79.076	2000-2013
32	Q5	Reserva Biologica San Francisco	3°58.45' S	79°04.23' W	1953 m	-3.974167	-79.0705	2011-2013																							32	4.23	58.45
33		Quebrada San Ramon	3°58.59' S	79°03.79' W	1880 m	-3.9765	-79.063167	2013																							33	3.79	58.59
34		Quebrada San Ramon	3°58.61' S	79°03.79' W	1878 m	-3.976833	-79.063167	2013																							34	3.79	58.61
38		Reserva Arcoiris	3°59.28' S	79°05.66' W	2157 m	-3.988	-79.094333	2013																							38	5.66	59.28
39		Reserva Arcoiris	3°59.38' S	79°05.80' W	2118 m	-3.989667	-79.096667	2013																							39	5.8	59.38
40		Bombuscaro	4°06.84' S	78°57.97' W	1120 m	-4.114	-78.966167	2011																							40
41		Bombuscaro	4°06.83' S	78°57.99' W	1130 m	-4.113833	-78.9665	2011																							41
45		Parque Nacional Podocarpus, Mirador	4°06.77' S	78°58.41' W	1470 m	-4.112833	-78.9735	2012-2013																							45
46		Parque Nacional Podocarpus, Mirador	4°06.75' S	78°58.41' W	1530 m	-4.1125	-78.9735	2013																							46
48		Reserva Copalinga	4°05.30' S	78°57.94' W	1213 m	-4.088333	-78.965667	2013																							48
49		Reserva Copalinga	4°05.14' S	78°57.97' W	1343 m	-4.085667	-78.966167	2013																							49
50		Parque Nacional Podocarpus, Cajanuma	4°06.86' S	79°10.48’ W	2897 m	-4.114333	-79.174667	2008-2013																							50
51		Parque Nacional Podocarpus, Cajanuma	4°06.85' S	79°10.47’ W	2916 m	-4.114167	-79.1745	2008-2013																							51
60		El Tiro	3°59.55' S	79°07.30' W	2590 m	-3.9925	-79.121667	2011																							60
61		El Tiro	3°59.46' S	79°07.58' W	2630 m	-3.991	-79.126333	2011																							61
70		Cerro Toledo	4°23.13' S	79°07.11' W	2938 m	-4.3855	-79.1185	2013																							70
71		Cerro Toledo	4°22.78' S	79°06.76' W	3021 m	-4.379667	-79.112667	2013																							71
80		S Romerillos Alto	4°13.64' S	78°56.45' W	1523 m	-4.227333	-78.940833	2013																							80
81		S Romerillos Alto	4°13.64' S	78°56.46' W	1537 m	-4.227333	-78.941	2013																							81
99		Estación Cientifica San Francisco	3°58.29' S	79°04.74’ W	1850 m	-3.9715	-79.079	1999-2013																							99	4.74	58.29

## Sheet: First study
		Elevation (m) —>	1020	1025	1380	1380	1800	1800	1850	1875	2005	2005	2112	2113	2180	2212	2290	2308	2375	2387	2524	2558	2671	2677
Genus	Species	Site code —>	19	20	21	22	1	8	9	2	3	10	4	11	12	5	13	6	7	14	15	16	17	18
Ophiogramma	coenobiata		1	1
Acrosemia	vulpecularia		1
Acrotomia	muta														2	2	2		3	1
Acrotomodes	ingridae																		2		2	1	1	1
Acrotomodes	kunoi																				2
Acrotomodes	lichenifera												1	1	2		2	1	1
Acrotomodes	lindae																				1
Aenictes	sororcula									2	3									1				1
Anisoperas	rectilinea			2	1	4
Anisoperas	tesselata		1	1
Apiciopsis"	maciza													1		2
Aplogompha	lafayi		34	83		1
Aplogompha	opulenta		6	18
Aplogompha	riofrio		25	43
Aragua	bistonaria											1	3			3	4	1	5	11	1	1		5
Argyrotome	mira		1
Argyrotome	prospectata		2	1	1		23	17	1		2		2		1	2	2		1	1
Astyochia	cloelia						2	3				1		1										1
Astyochia	paulina														1
Astyochia	philyroides																				1
Astyochia	sp					1
Astyochia	vitrea						1	5		1		1		1	3	2
Aventiopsis	excisa			2
Ballantiophora	sp nr gibbiferata			8
Bassania	extremata															1	1		1			1	1
Bassania	goleta																			1
Bassania	olivacea											1		1
Bassania	sp																		1	2		5
Bassania	sp													1	1
Bassania	sp nr amethystata							1					1										6	2
Bassania"	crocallinaria							2					1			1
Bonatea	duciata										4	11	10	3	14	15	2		1	3
Bonatea	funerea							1			2	10	16	2	3	7			1		1	1	1	2
Bonatea	sp nr viridilinea							2					1					1	7	7	1	3	2	1
Bonatea	viridilinea			2	2	3	11	3	8	15		1	1		1	1
Bonatea	viridirufa							1	1		10		10		5	1		1
Brachyctenistis	incongruata																					1	2	1
Bryoptera	basisignata		1				4	2
Bryoptera	friaria				5	4	2	1		1
Bryoptera	fulvisquamosa					2			1			1
Bryoptera	injunctata			1		1	5	2	2	2	2
Bryoptera	sp				1	1	1	2		1	14	9	2	1	8	3				1
Bryoptera	sp								1	2		1	1
Bryoptera	sp nr friaria			1	5	6			2
Budara	partita				1				2			1	1
Budara	sp								1				1
Callipseustes	semifimbriata				6					1
Callipseustes	sp			1
Callipseustes	sp nr pullaria			4
Callipseustes	sp nr trisecta						3	1		1
Cargolia	arana				2	1	8	3	4	16	3			1	1	2				1		1		1
Cargolia	pruna										1	1	6		3	1	3	4		3	1	2	6	6
Carpella	miegii			1
Certima	espuma			1
Certima	esquina																					1
Certima	lojanata					1	1	4					1		1	1		1		2		2	2	3
Certima	miligina									1			1		1	1		1
Certima	sp							1	2
Certima	sp						10	11	1	2		1								3
Certima	sp									1
Certima	sp			1
Certima	unilineata								1							2
Certima	xylinochroma										1	2			1	2						1	1
Charca	fulminea											1	1
Charca	oppositata		2	4				1
Charca	ornata			1	1	2
Charca	sp																		1		1	2
Charca	sp nr daphnea														1	2								1
Cimicodes	albicosta			1
Cimicodes	ferruginea														1
Cimicodes	sp		9	6		2				1	1	4	3	3		1
Cirsodes	acuminata						1		2		4	7	1						2	1
Cirsodes	bella														1
Cirsodes	casta											1	1		3	3	1	1	1	2
Cirsodes	leodorata											1
Cirsodes	macilentata										2	2	2		1	1	1
Cirsodes	meridaria										1			1	1		2	2	1	3	1
Cirsodes	puntiaguda															3		1	1	3	5	3	4	9
Cirsodes	sp nr casta																					1	2	6
Cosmophyga	mosticana																			1
Cosmophyga	privataria													1	1	1	1			1
Cratoptera	vestianaria			3
Crocallis"	sp nr multilinea			1	1	2																	1
Cyphoedma"	transvolutata			1			1	2	4		3	2	5	3	4	1
Epimecis	conjugaria		1
Epimecis	diffundaria		1	1		1	1	2	2		1	1				1				1
Epimecis	marcida		1
Epimecis	plumbilinea			1
Erosina	rusticata					1
Erycinopsis	diaphana					1
Eusarca	bogotata											1												1
Eusarca	colorifera				1	1
Eusarca	crameraria				1	1
Eusarca	fractilineata											1
Eusarca	nemora		4	7	1				1
Eusarca	sp								3							1
Eusarca	sp																	1			1			1
Eusarca	sp			1
Eutomopepla	rogenhoferi			2	2	1	1	2					1					1
Fulgurodes	sp nr perasata		2
Furcijuxta	emilia										1			1		1
Furcijuxta	sp nr mathilda			1										1
Glena	sp					1
Glena	sp nr juga		1	20	1	1	1		1	1	1				2
Gypsara	exularia		1	1	2																1
Hemixera	fulvida															2
Herbita	aglausaria flavidiscata									1				2
Herbita	zarina										1		3			18	2	3		1
Herbita group 1	praeditaria		1	1
Herbita group 2	chiomaria		1									2		2	5	10	8	7	8	17	3	11	3	1
Herbita group 3	decurtaria		2	4	3							1
Herbita group 3	dognini		1	1	2	2	1	1		4	4	3	1		2	2				1
Herbita group 3	opalizans												1	1			1
Herbita group 3	tenebrica															1				1
Hygrochroma	nondina										1
Hygrochroma	olivinaria				5	3
Hymenomima	rufata															1
Hymenomima	semialba			1
Hymenomima	sp		4
Hymenomima	sp nr memor			1	2
Hymenomima	tharpoides		1		1
Hypomecis"	pagana			1
Hypometalla	mimetata vecina		1	1
Ira	somnolenta											1
Iridopsis	anaisaria		30	62
Iridopsis	chalcea				1	1
Iridopsis	fuscolimbaria			1
Iridopsis	gaujoni		27	100	1	3	4	3							1
Iridopsis	huambaria		4	1			1
Iridopsis	litharia			2	3	1	1		1	3	2	1									1
Iridopsis	muscinaria						1	1
Iridopsis	nephotessares								1						1		2	1				1
Iridopsis	scolancala		8	12		7	2	1	1		1						1
Iridopsis	sp nr subnigrata			5	5	2				2	3		1	1	3	2	2		2	2	3	3		1
Iridopsis	subnigrata								2	1			1										2	1
Iridopsis"	validaria		3	3
Ischnopteris	brehmi							2		1	9	3	8	1	2
Ischnopteris	bryifera		1
Ischnopteris"	callistrepta																							1
Ischnopteris"	festa				1
Ischnopteris"	festiva			1					1
Isochromodes	bidentata																						5	3
Isochromodes	brumosa			1	3		1	1
Isochromodes	crassa										1	2	1		2	8	3		1	3
Isochromodes	extimaria		1	17	2	1			3	1	2	1	11	1	3	12		1	4	2
Isochromodes	fallax																				2	3		2
Isochromodes	fraterna			1			1	1		6	1	1			1	1	1			1	2			2
Isochromodes	palumbata			2	1		1		2	2	3	2										1	1	4
Isochromodes	pectinicornata										1	1	11	2	14	18	6	7	5	5	7	4	6	5
Isochromodes	polvoreata						1			2	1	1	8	5	11	10				1
Isochromodes	propinqua												1	1	1	1
Isochromodes	sabularia			1							3				1	3
Isochromodes	sp						1					1
Isochromodes	sp				1				1					1	2
Isochromodes	sp				1				2	2	2	1
Isochromodes	sp									1		4		1	1	1					1	1	2
Isochromodes	sp															1
Isochromodes	sp										1		6		1	1
Isochromodes	sp																		1	1	2	1
Isochromodes	sp			3	6	4			5		1	1	7		3	6			6					1
Isochromodes	sp																						1
Isochromodes	sp																1							1
Isochromodes	sp					1
Isochromodes	sp nr crassa						2				17	3	3	2	12	5	2	2	17	20		3	2	1
Isochromodes	sp nr duplicata										3									1		1
Isochromodes	sp nr pectinicornata									2		1			1
Isochromodes	sp nr sabularia										1		3		1	2			1
Isochromodes"	atristicta								1	2	1		1	1
Isochromodes"	nigripunctata								1	1	1				1		1
Leuciris	beneciliata		5	18
Leuciris	institata			1
Leucula	sp nr ablinearia				1
Leuculopsis	bilineata												3		3	2
Leuculopsis	pulverulenta														1	1		1	8	6	1	1		1
Leuculopsis	sp nr pulverulenta										1		4		5	2	4	1	1	2	1	1		2
LITHININI	sp																		2	1	2	3	1	2
Lobopola	cimarrona																1	1	3	3
Lobopola	sp									1
Lobopola	sp								1
Lomographa	albifrons						2	3		2			3	2	3	2				2
Lomographa	bicineta						1	1		2	3	3	5	1	8	21	4	2	5	4
Lomographa	chartularia						1		2	2		7	16	20	35	9	2		3	4
Lomographa	circumvallaria									1	1		1	1	5	6	1	1
Lomographa	griseata																					1	3	6
Lomographa	luteocephalata															1	1	4		2			1	1
Lomographa	nubimargo													1	9	15	6	4	5	10
Lomographa	perampla			1
Lomographa	sp nr argentata		1	2
Lomographa	sp nr argentata			2
Lomographa	sp nr bicineta										1				1	2	1
Lomographa	sp nr chartularia												2		1	5
Lomographa	tributaria			4	2	2	5	6	4	5	6	1	8		9	27	4	4	4	5	5	6	3	4
Loxaspilates"	torcida						2	1			1
Macaria	acutaria			4	3	2
Macaria	bejucoaria																		1	1
Macaria	cardinea		17	10	10	9
Macaria	catualda			3
Macaria	lapidata								1	2	3	5	10	6	9	6	4	1	1	1	1
Macaria	lydia					2
Macaria	ostia		1	5	16	11	1	1	3		1							1
Macaria	postnigra			4
Macaria	regulata		1	4
Macaria	sp			1	1
Macaria	sp		1	3
Macaria	sp nr indentata								1	1	2
Macaria	tristaria			1	1
Mallomus	galbanata																							2
Mallomus	synopsioides			1																				1
Melanolophia	conta		3	7
Melanolophia	muscosa		2	5	6	4
Melanolophia	reducta meridiana							1		2							2		2	2
Melanolophia	sp														1	2		1	1	2	5	4	7	10
Melanolophia	trisurca								1					1					1
Melanolophia"	atigrada								1			1			7		3		2
Melanoscia	felina							1		1		3	2	2	2		1		1	2	1	1
Melanoscia	thiaucourti													2	4	3				1	1
Melinodes	albarita		1	1
Melinodes	detersaria									1		1	1	4			1	1	2		1
Melinodes	saeta						3	1	1	6					1
Melinodes	sp nr subapicata													1
Melinodes	subspurcata				2
Melinodes"	fulvitincta									1				1
Melinodes"	sp nr ignea								1													2
Mesedra	attenuata									1
Mesedra	confinis																	3	4	5	4	3	6	11
Mesedra	munda											1			1
Mesedra	sp		1	1	3	3	1		3	4	8	3	5	9	19		3		2	8			3	1
Mesedra	sp nr confinis											3				1	1
Mesedra	sp nr confinis									2
Microxydia	colorata														1
Microxydia	fulvicollis								1	1						9	4	12	5	11	2			2
Microxydia	sp nr ruficomma				1	1	9	8	5	8	3	1	2	1		1
Microxydia	sp nr strigosa								1		1				1	8	1	1		1
Microxydia	strigosa				8	2				1
Mimosema	sp nr sobrina										1
Mimosema	sp nr sobrina		2	4			2	3			1
Mimosema	versilinea									2		2				6	2		3	1	2	1
Mychonia	corticinaria						1	2		2	1		3	2	3	13	1	4		1	2
Mychonia	galanata							1															1	1
Mychonia	sp														1					1
Mychonia	sp																				1	5		8
Mychonia	tepida																1	1		1		1
Mychonia	violacea		2
Myrmecophantes	albifascia		3	2
Narragodes	ochreata															1	1
Nazca	indentata						1		1	1		3	20	6	38	24	28	11	30	31	3	2	1	1
Nazca Nazca	zofra					1
Neazata	fragilis							1	1		2	1	6		8	2	1			1
Nematocampa	angulifera		21	11
Nematocampa	sp nr falsa						3	1	3	9	5	3
Nematocampa"	interrupta		1	4
Nematocampa"	sp				2
Nematocampa"	sp nr confusa						1	1	2		20	3	13	16	5	13
Neodora	costinotata													1		3	1	1		1
Neodora	glaucularia							1	1	1	3	1		1		7	3	1	1	1
Nephodia	admirationis																							1
Nephodia	aethiopissa			2
Nephodia	clara				4	3
Nephodia	claudaria		1	1	1
Nephodia	coenulenta																				1	1	2	1
Nephodia	crata		2	11	1	3
Nephodia	dividua					1
Nephodia	filiforma																						1
Nephodia	folla		4	2
Nephodia	fumilinea									1
Nephodia	illota							1					1				3			1
Nephodia	maturata																				1	1	3	2
Nephodia	nudata																					2	3	1
Nephodia	occulta												2		1	2				2
Nephodia	pania				1									2
Nephodia	pardata														1
Nephodia	pecalba										2	3	1	4	5	2	1	1		2
Nephodia	pellucenta																6		7	6	4	4
Nephodia	pieria			1	1
Nephodia	rotundata			1
Nephodia	secturata																							1
Nephodia	sororcula						5	2			1	1	7	4	10	1	1			1
Nephodia	sp								1	1
Nephodia	sp														2				1					1
Nephodia	sp			1
Nephodia	sp																			1		1		3
Nephodia	sp nr astyochiodes							1			6	5	4		2	2				1
Nephodia	sp nr exclamationis						1								3	1				1	1	1
Nephodia	sp nr hija							1	1		3	4	5	3	2	2
Nephodia	sp nr manchata																				1	5	2	5
Nephodia	sp nr occulta																				2	2		1
Nephodia	sp nr orcipennata			1
Nephodia	sp nr subocellata			2
Nephodia	trisecta				1	1
Nephodia	turpis						1						1	1						1
Nephodia	vestigiata				1		1
Nephodia"	fumosata			2	7	2		1															1
Nephodia"	mundaoides		2	5
Nephodia"	philomela		5	17
Nephodia"	sericea			2	1
Nephodia"	sp				3								1		4	1					1		2
Nephodia"	sp nr organa				3	2				3		1			1
Odysia	excurvaria																			1	1	1		2
Odysia	sp															1			1
Odysia"	venusta		1	6			2
Oenoptila	anetteae												2	5	1	1				1		1
Oenoptila	camptogrammata													1	1			1	1		1			1
Oenoptila	costata											1			1
Oenoptila	prunicolor														1	1		1		2	1	1
Oenoptila	recessa																			1
Oenoptila	sp nr camptogrammata																					1	1	2
Oenoptila	sp nr nigriceps						1					1	1										1
Oenoptila	sp nr separata													1		3	2	2				1	1
Oenoptila	violacearia								1	1					1		1				1
Oenoptila"	leprosata									1			1		4	8	6	9	13	21
Oenoptila"	sp nr filata							1	2			10	6	3	3	3	2	1	1				1
Opisthoxia	archidiaria						1	1	1	1	2	2	3	2	2		1
Opisthoxia	branickiaria								1			1	1
Opisthoxia	descimoni											1			1			1		2
Opisthoxia	geryon									3
Opisthoxia	metargyria			1						2						1
Opisthoxia	pepita		1
Opisthoxia	sp nr archidiaria				1	1
Opisthoxia	sp nr claudiaria										1
Opisthoxia	sp nr danaeata						1		1		2	1	1		1	1				2
Oxydia	apidania		4	3
Oxydia	augusta							5				1	1											1
Oxydia	distichata			1	1
Oxydia	fulcata			1
Oxydia	geminata				5	1				1			1	2	3	3		1	1	1			1
Oxydia	herbertina			1			1
Oxydia	masthala			15		2
Oxydia	mexicata				1					1
Oxydia	nimbata		1
Oxydia	olivata			1								1
Oxydia	optima						1			1										1
Oxydia	rotara		3			1
Oxydia	scriptipennaria		3	2	7	5	2	3	2	1														1
Oxydia	sp nr agliata								1					1
Oxydia	sp nr olivata		1					1	1		1										1
Oxydia	subdecorata						1							1
Oxydia	subdensata			1				1											1		1	1		1
Oxydia	translinquens			1					1			1
Oxydia	trychiata			15	21	14	6	1	12	4	12	15	11	3	20	9			3	4
Oyxdia	sp		1	3															1
Pantherodes	colubraria viperaria			1	2	2	3	1	1	2			1								1		1
Pantherodes	conglomerata		1	1	2	1	4	1	3	4						1		1
Paragonia	cruraria			2	11	3
Patalene	asina		1
Patalene	flavibasis										1	1	1		7	6	1	1	1	3
Patalene	fulvilinea						1				1		2		1	12	1	3	1	4
Patalene	pholata				2	2
Patalene	sp nr hamulata						2	1		1		2	14	1	5	13	1	4	2	6				1
Patalene	sp nr hamulata												1			3	2
Penthophlebia	altaba			2
Periclina	apricaria							1
Periclina	rumiaria			1					2						1
Periclina	sp nr merana				1		2	1
Periclina	sp nr rumiaria				1
Perissopteryx	commendata		1	2
Perissopteryx	raveni			1	6	2
Perissopteryx	sp													1
Perissopteryx	sp nr distincta				1
Perissopteryx	sp nr nigricomata			1		1	1			2				1	1						1	3	1
Pero	albiorbis						1							1		1				1
Pero	algerna																				1
Pero	buckleyi				3	2		1	2	3	3			2	2		4
Pero	caustomeris										1					2					1			1
Pero	gamuza														1	1		2	1	3	1	2	1	6
Pero	homodoxa										1
Pero	maculicosta							1				1
Pero	mathanaria		1
Pero	mnasilaria		1
Pero	periculosaria													1	2							1		1
Pero	plenilunata			2			2	1	7	3	2	3	2	3
Pero	rapta		1	3
Pero	rosota														1	1			1	1		3
Pero	scitaria														1			1		2			1
Pero	semiusta		4	1		1
Pero	sp			1
Pero	sp nr rapinaria										2		1		2	1	1	1	3	3	1
Pero	sp nr semiusta																					1	1	1
Pero	sp nr tabitha										1
Pero	speciosata				1		2		1
Pero	spectrata				1	3
Pero	trena													1					1
Pero	tricaria							2														1		2
Pero	unfortunata				1
Pero	yahua				1
Perusia	sp							1	1					4	3	10	1		2	2
Perusia	sp										1	1
Perusia	sp			1									1		2	1	1	1		1	1	3	2	3
Perusia	sp									1
Perusia	sp									2	1
Perusia	verticata		1	1	1				1				1
Perusia	viridis														4	2	3		9	8	6	1	4	5
Perusia	zoma																				3	2
Petelia"	anagogaria								1	2	2			1	1	3	3	1	2	4
Petelia"	binigrata													5	3
Petelia"	interrupta subconfusa															1	1			3
Petelia"	nigriplaga										1	1							1	1
Petelia"	nummifera			1			1	1	1										1	1
Petelia"	plagiata				1																	1
Petelia"	purpurea								1	1					1		1			1	1
Petelia"	sp														1		1		2	3	6		2	1
Petelia"	sp													1			1
Petelia"	sp				1					1												1
Petelia"	sp																			1
Petelia"	sp														1	4			1	4
Petelia"	sp																					1
Petelia"	sp nr cariblanca								1	1		1	2								1	1		1
Petelia"	sp nr interrupta												1	1	1
Petelia"	sp nr pallidula								1			1			2
Petelia"	sp nr plagiata											1			1		1			1	5	3	4	4
Petelia"	sp nr purpurea						1										1		1
Petelia"	sp nr purpurea																				1			4
Phaludia	xanthomelaena				2	3						1
Pherotesia	coiffaiti		1	2	1
Pherotesia	subjecta							1			3	3	5	2	4	4	5			1
Pherotesia	subsimilis			2	1
Pherotesia	suffumosa													1						3				2
Phrygionis	flavilimes									1	2				2	10	3	3		4
Phrygionis	platinata								1	4	4	7
Phrygionis	polita						2	5		3	3				1
Phrygionis	privignaria			1
Phyle	transglauca			2	1	1									1	2			1	3	4	1	1	1
Phyle	versatile												9	7		4	1	1
Phyllodonta	caninata						1	1				1
Phyllodonta	cataphracta											1				1
Phyllodonta	flabellaria							1				2	1	1		2	1	1
Phyllodonta	flexilinea																							1
Phyllodonta	muscilinea						2										1			1	1	3
Phyllodonta	obscura										4	1	4			4	9	4	4	9	1
Phyllodonta	semicava										1	3	3	4	8	4	6		4	8
Phyllodonta	sp nr flabellaria							1	1			3	15	3	8	11	4	2	6	9	2
Phyllodonta	succedens		3	1		1	2	1								1
Physocleora	bella			1	3	3	1			2
Physocleora	castaneata																		1
Physocleora	celosoides								1	2	5	2	6	11	1	3		1	1	2
Physocleora	conveniens																							1
Physocleora	curvifera		1	3
Physocleora	enana		3	5	8	1				1	1	2	6		1	1				1
Physocleora	flaviplaga						2		1	6
Physocleora	latimedia			1								1		1	2	1		1
Physocleora	mniophilaria				2	3	1	2	18	26	1	2		1	1
Physocleora	pergriseata																					1	1	3
Physocleora	piperacea						1	1												1
Physocleora	pulverata			4	5		8	9	90	85	39	21	29	21	22	24	4		4	6	2	1	1	3
Physocleora	punctilla			4	1
Physocleora	scutigera		1	1	3
Physocleora	sp						1				1
Physocleora	sp			4	66	16	1			1		2	2		1	1
Physocleora	sp			2
Physocleora	sp nr accessilinea						1		1	3	1				2
Physocleora	sp nr delgada				1		2	1	3	9	1
Physocleora	sp nr grosica		4	6	1	1
Physocleora	warreni																1	1						1
Pityeja	histrionaria								1			1	5	1	3	3			1	2
Pityeja	nazada																			1
Polla	aristaria					1
Postazuayia	stigmatalis																							1
Prochoerodes	pilosa							3	1	4	3	11	6	1	5	17	1
Psilosetia	sp nr pura			2	1
Pyrinia	abditaria			2
Pyrinia	coearia															1
Pyrinia	divalis								1				1
Pyrinia	gallaria				2	1				1	1								1
Pyrinia	megara		1	3	1					1		1			2				2		2	1	1	3
Pyrinia	sp							2		1			1			2			1	1
Pyrinia	sp		1	1						1
Pyrinia	sp		1	1
Pyrinia	sp nr sanitaria				2							1			1	1
Pyrinia	vanidosa			1
Quillaca	versipennis					1
Rucana	abnormipalpis			1				1	2	4			1
Rucana	bisecta								1	2
Rucana	degener						1	1	1	4	7	4	8							2
Rucana	sclerovesica				1					1
Sabulodes	boarmidaria		1	5
Sabulodes	boliviaria										1	1	2	1	11	2	1		1	4
Sabulodes	caberata oberthuri									3	2	1			1
Sabulodes	ornatissima			2
Sabulodes	prolata				1
Sabulodes	sp nr carbina					1	2		10		9	5	1		2	1
Sabulodes	sp nr carbina												1		2	4			1		11	7	3	6
Sabulodes	sp nr carbina				3
Sabulodes	thermidora			1			35	39	2	7	8	1	3		7	3	7	1		4				2
Sabulodes"	mima		1						1				1			1
Sabulodes"	sp nr lineata				1	1	1		1			1
Salasaca	spinea																						1
Semiothisa	radiata									1					2
Semiothisa	sp nr quadriseriata				1	1
Semiothisa"	mayana		1	1					1		3				2	1	1		1
Semiothisa"	regressa				1		1	2				1
Sericoptera	mahometaria		6	3			1	1		1									1
Sicya	pomona			1			1	1							2
Sphacelodes	vulneraria		3		2										2		6
Stegotheca	albipennis									1
Stegotheca	costiplaga																			1
Stegotheca	cythereata		2	2
Stegotheca	sp																							1
Tarma	theodora									1
Thysanopyga	sp nr nigricosta			2
Thysanopyga	sp nr pygaria		1
Thysanopyga"	casperia			1
Thysanopyga"	sp nr casperia			1
Thysanopyga"	sp nr nigristicta		1
Trotogonia	agelaea		1
Cathydata	batina			1										2
Chavarriella	fallax				4	3
Chavarriella	lafayaria																							1
Chavarriella	psittacina											1		1
Chloropteryx	dealbata			3
Chloropteryx	opalaria				5	2	14	18	14	21	15	3	2		2
Chloropteryx	sp nr stigmatica		1	3					1	1	1
Chloropteryx	stigmatica				1
Hyalochlora	nadia														2					1
Hydata	projiciens							1			1						2		2
Hydata	propinqua																					1		2
Hydata	sp nr elegans					1
Hydata	stigmatica					2				1	2		1		1		1
Hydata	subfenestraria					1							1							1
Lissochlora	cecilia			3	1			2	2	1	6	1	2	1	7	3	1	1		3				1
Lissochlora	diarita			1	3	1			1	1						1
Lissochlora	hena																			1
Lissochlora	hoffmannsi		1	11	4	1		1	1	4	1		3	2	16	4	6	2	4	8
Lissochlora	jenna														1		1		2		1		1	1
Lissochlora	latuta		1	6	3	2	3	5	7	6	9	3	23	7	25	3	20	6	10	13	3	3	16	14
Lissochlora	pasama																				1
Lissochlora	punctiseriata																						1
Lissochlora	rufipicta																					1
Neagathia	corruptata			2		1	1
Nemoria	aturia scotocephala				2			2	1	2	2		1		7	3	7	1	8	8	6	1	1	1
Nemoria	conspersa			1
Nemoria	delicataria						1	2			1	1	1	2	3	2
Nemoria	dentilinea			2	6	5
Nemoria	erina			2
Nemoria	heterograpta										1		1
Nemoria	imitans		3		2	4	1	1		1
Nemoria	nigrisquama						4	1		1
Nemoria	roseilinearia																							1
Nemoria	sp nr characta									1
Nemoria	sp nr conspersa				1
Nemoria	sp nr hazelae				1
Nemoria	sp nr inaequalis								1
Nemoria	sp nr sellata				1									3
Oospila	asmura																	1
Oospila	atroviridis														1
Oospila	concinna														2
Oospila	confundaria			1
Oospila	ecuadorata			1			1	2	2	2	3	3	1
Oospila	lacteguttata						1		4
Oospila	lunicincta											1	1
Phrudocentra	opaca			1
Phrudocentra	subaurata									1					4		1			2	1
Phrudocentra	trimaculata			1							1
Phrudocentra	vagilinea		1
Poecilochlora	minor							1		1		1			5		1
Rhodochlora	roseipalpis						1	1					1	3	6	3	1		1		2			1
Synchlora	amplimaculata		2	1		1	2			1		1	6	2	4	2	1	1	1	1
Synchlora	bidentifera		1	2	1	4
Synchlora	decorata		1	2	6	2									1	2
Synchlora	dependens tumefacta						3	2	1	1	1				2	1			1	2	1	1	1
Tachychlora	flavidisca														1							1
Telotheta	muscipunctata				2	4	2			1
Brabirodes	cerevia											1								1
Callipia	constantinaria																1			1
Callipia	parrhasiata												1			2			3	2				1
Callipia	sp																1					1
Cirrhorheuma	androconiata						1								1
Deinoptila	cazadora																2			2	1		1	5
Deinoptila	penicula												1		2	12		1	3			1		1
Distoneura	pastaza						1
Dyspteris	breviataria			2							1
Eois	adimaria																			1
Eois	amarillada			1											4	1
Eois	angulata			2	2	1	1		1
Eois	antiopata				2	4
Eois	azafranata						2			1		1	10	16	66	30	53	54	35	55	7	8	5	10
Eois	basaliata		1	2			2	4		4	1
Eois	binaria		4	10	5				2
Eois	biradiata												3		11	1		1		2
Eois	borrata				1				4	5	10	3	7	9	55	9	37	4	17	10	4	1	2	1
Eois	burla						4	2		2	5	1	2	4	7	1	10	1	4	2	1	2		1
Eois	camptographata		1		1	1
Eois	cancellata					1		1			1		9	5	10	2	4	1	1	3				2
Eois	carrasca					1								1	1
Eois	chasca				2	3	1	2	3	1	2	5	1	3	3	1	3			1
Eois	chrysocraspedata						2			3	1
Eois	ciocolatina			2	4	1	5	2	6	11
Eois	cobardata														5		9	2	2	5	1		1	1
Eois	cogitata																	1	1	3	6	5	11	9
Eois	contraversa																							1
Eois	encina				1		1	5	1	1			1		1					1		2	1
Eois	escamata																1	3		1	1
Eois	fasciata				4	2
Eois	golosata		2	3			1	2	1	1		1	5	2	29	2	16	3	3	4
Eois	goodmani						1		1	3							1		1				1
Eois	ignefumata			1
Eois	lavendula																					1	1	1
Eois	lucivittata			4	2	3	2
Eois	margarita						4	2		3	4	8	4	2	4		8	1	5	4
Eois	mediostrigata				3	2	2	1	1	2
Eois	muscosa			4	7	2
Eois	neclas			1	2	2																		1
Eois	necula														1		1
Eois	nigricosta				5	3				1												1		1
Eois	nigrinotata																					1		2
Eois	nigrosticta			4			1			1		1		1			1	1	2	7
Eois	obada		1	3															1			1
Eois	odatis		1	1	1	1	1		1
Eois	olivacea			4	3	5		1	4	9					1							2
Eois	paraviolascens				5	4	3		2	4	1					1	1				1
Eois	paulona		1			1	2		2	3	3		2		1	2			1	1	2	2		1
Eois	plana				1		1			2			1			1
Eois	planetaria						1		2					1	1						1			1
Eois	sagittaria										1				1
Eois	scama																				1	1		1
Eois	sp											3	3	2	1	3	2		3	1		1
Eois	sp								1			1	2			1			1
Eois	sp								1	1
Eois	sp														1
Eois	sp								3				13		1		1
Eois	sp								1	2
Eois	sp					1
Eois	sp						2	1
Eois	sp								1
Eois	sp				1		1													1
Eois	sp				1
Eois	sp			4	7	2			1
Eois	sp																				1		1	8
Eois	sp																						2
Eois	sp																							1
Eois	sp nr adimaria								1		1			3	27	6	15	1	10	17	3		1
Eois	sp nr canariata		2	2
Eois	sp nr catana			6	1			1	1	2
Eois	sp nr commixta																1
Eois	sp nr dorisaria			1			1										2
Eois	sp nr encina				1		4
Eois	sp nr fucosa				19	8	3	1	2	7						2			1				1	1
Eois	sp nr fulvicosta																						3	5
Eois	sp nr haematodes																					1
Eois	sp nr inflammata							1				1	1		2			1				1		1
Eois	sp nr lunifera			2	1					1
Eois	sp nr odatis						1					2			1
Eois	sp nr olivaria			2			1			1
Eois	sp nr restrictata		2	8	1		1		3	2	3	2	1	2	1	1	1							1
Eois	sp nr sagittaria										1				1				1			2
Eois	sp nr tegularia			1		1				1						1						1
Eois	sp nr yvata												2		3	1	4	3	3	5	1	1	2	1
Eois	subpallida												1									1
Eois	tegularia		2	7	1		1	1		2
Eois	trillista			1			1	1	1	1	1						5	1	8	6	1	1	1
Eois	veniliata																					2
Eois	vinosata			1
Eois	xanthoperata		3	8	1	1			1		1	1		1	4		2					1
Eois	zorra																						1
Erebochlora	simulator																							3
Ersephila	sp nr prema																		1		1
Euphyia	acerbata															1	1		1	1		2
Euphyia	aguada							1													1
Euphyia	alboscripta																				4		2	1
Euphyia	balteata													1			1			1
Euphyia	cinerascens				2		1	1	4	1
Euphyia	consequata											1
Euphyia	disconnexa			1	1
Euphyia	infundibulata																						2
Euphyia	porraceata		6	15		1							1
Euphyia	psyra							1
Euphyia	rojiza									1		2	2	1	1	2	1			3	1		2	5
Euphyia	sp														1	1	3		2	8		1
Euphyia	sp									4						1								1
Euphyia	sp																			1
Euphyia	sp					1
Euphyia	sp nr acerbata										1	1				2
Euphyia	sp nr caliginosa				2
Euphyia	sp nr consequata										1
Euphyia	sp nr fringillata						1			1	2			1	4		6		1	3	2	1	2	3
Euphyia	sp nr zara										1
Euphyia	subguttaria		11	11	20	15	1				1						1				2	2	5	3
Euphyia	trujillaria					1		1
Euphyia	violetta				3
Euphyia	zalmoxis		1	2
Euphyia	zara									1							3					1
Eupithecia	acragas																			1	2		2	1
Eupithecia	albifusca																				1			1
Eupithecia	albirasa						1							1	3	13	4	1	11	10	3	2	2	1
Eupithecia	albirivata															2			1	2
Eupithecia	albisecta													2		1
Eupithecia	anita			1	10	14	1				1			1	1
Eupithecia	batida			1	6	6	1				1				1
Eupithecia	bullata					1				2		1		1	1	1				1
Eupithecia	casta								1				1	1
Eupithecia	costivallata												1		5	1	1		11	5		2
Eupithecia	cuneilineata																			2	1
Eupithecia	cunina							1					1						1
Eupithecia	cupreata													1		1		1	1
Eupithecia	descimoni															1	1			1	4	1
Eupithecia	disformata						1	1		1				2	5	7	2	9	12	8	1	1
Eupithecia	drastica																1			1
Eupithecia	duena		1				2						1		4		3	2	4	3	9	5	6	14
Eupithecia	emporia																				4	4	8	5
Eupithecia	galepsa						1					1			1				1	3			1	3
Eupithecia	higa						1	1		1
Eupithecia	hilaris												1			6		7		6
Eupithecia	hippolyte																							1
Eupithecia	hormiga						3	1					2		2	5			1	2	1	1	2
Eupithecia	lachaumei									2					1	1
Eupithecia	linda										1	1	3			2	1
Eupithecia	nigrithorax		1	2						1	1				1
Eupithecia	nigrodiscata																				3	1		2
Eupithecia	ochrosoma					1	4	1	2	2	2		5	1	3	3	1	1	3		2
Eupithecia	pallidicosta						1				1	2	4	8	8	15	6	4	1	4
Eupithecia	parallaxis						6	1	2	10			1		1	2			1
Eupithecia	penicilla									1				1	1	6		1
Eupithecia	philippis			1
Eupithecia	rubellicincta						8	1	3	13	3	2	15	3	17	16	15	4	13	41	25	18	6	13
Eupithecia	scione									1
Eupithecia	sobria							1							1					2		1		2
Eupithecia	sorda													1
Eupithecia	sp													1		1	1
Eupithecia	sp																				6	2	3	5
Eupithecia	sp						1	2					4	3	6	1	1		5	3	8		5	7
Eupithecia	sp											1			1	1				2
Eupithecia	sp						1			5					1	1
Eupithecia	sp													1	1								1
Eupithecia	sp														1				1			2	5	1
Eupithecia	sp																			2	4	2
Eupithecia	sp						2	1						2	3	18		1	3	1	2
Eupithecia	sp							1	1				1		3			1	2	1	1
Eupithecia	sp						5		1		1	1	1		2	4			2
Eupithecia	sp		1	1	2															1
Eupithecia	sp																		1
Eupithecia	sp		1
Eupithecia	sp																	1					1	1
Eupithecia	sp																			1
Eupithecia	sp												1						1	1		1
Eupithecia	sp																			1			1
Eupithecia	sp											1					1
Eupithecia	sp																		1					1
Eupithecia	sp																			1
Eupithecia	sp															1	2	1		3			8	1
Eupithecia	sp									1	1					2	1			1
Eupithecia	sp										1					1
Eupithecia	sp																1
Eupithecia	sp												1
Eupithecia	sp						1		1			1			3						1
Eupithecia	sp										1			2	5	2	4	1	8	6	13	11	25	31
Eupithecia	sp													1	2	4	5	3	6	11	6	1	6	4
Eupithecia	sp			3			6	9	2	4	3		3		1	1		1			1		3
Eupithecia	sp																				1
Eupithecia	sp						3			1	5				1	3			1
Eupithecia	sp								1										1	2
Eupithecia	sp			1			1				3	5	2		3	2			1		7	4	1	1
Eupithecia	sp																				2	1	3	3
Eupithecia	sp								2	1	1	2			1							1
Eupithecia	sp				5	3													1
Eupithecia	sp					1
Eupithecia	sp						1								1	1
Eupithecia	sp															2
Eupithecia	sp																1		4	1	8	4		2
Eupithecia	sp						1					1	3	2		6
Eupithecia	sp									1			1								3	1
Eupithecia	sp													1
Eupithecia	sp																			1
Eupithecia	sp															1
Eupithecia	sp										1				1
Eupithecia	sp														1	3
Eupithecia	sp																1
Eupithecia	sp								1						1	1
Eupithecia	sp											1		2	3	5
Eupithecia	sp													1						1	8	8	4	18
Eupithecia	sp												4			1
Eupithecia	sp											1
Eupithecia	sp												1	1	6	7	3	1	5	2	3	1	3	3
Eupithecia	sp				1								1		3	1		1	3	2		1
Eupithecia	sp										1		2		1	3	2	4	2	5	2		7	2
Eupithecia	sp				1		2			3	1				1
Eupithecia	sp																			1	3	2	2
Eupithecia	sp														3	3
Eupithecia	sp						1		2		1	1	8	2	5	2			1	1	2
Eupithecia	sp																				1		2	1
Eupithecia	sp									1	1				3	1			8	3	4	1	1	2
Eupithecia	sp													1	5	1	5	2	10	9	21	7	15	26
Eupithecia	sp																							1
Eupithecia	sp																					1	1
Eupithecia	sp																						2	2
Eupithecia	sp																				13	8	4	7
Eupithecia	sp																					1	5
Eupithecia	sp																						1
Eupithecia	sp					1
Eupithecia	sp		1
Eupithecia	sp				1	1	1
Eupithecia	sp				2								1
Eupithecia	sp		9	4		3
Eupithecia	sp				1
Eupithecia	sp nr albifusca										1					3	1		2	2	6	1	2	1
Eupithecia	sp nr albifusca																				6	2	3	8
Eupithecia	sp nr albirivata		3	1	1
Eupithecia	sp nr contexta							1		1	1	1	1	5	9	10		4	5	2	1			2
Eupithecia	sp nr contexta										1							1
Eupithecia	sp nr contexta														2	3	1	2	1
Eupithecia	sp nr cunina																				1	1	3	11
Eupithecia	sp nr idalia														1	8	1	6	1	10	5	1	11	7
Eupithecia	sp nr junctifascia			1								1			1	1	1	1	4	7
Eupithecia	sp nr junctifascia									1			1			1
Eupithecia	sp nr madura							1						1	2	4	1	3	2	9
Eupithecia	sp nr penicilla									2	2		2	4	1	7	1		6
Eupithecia	sp nr pulgata																					1	3
Eupithecia	sp nr rubellicincta						1			1			1	1	2	7	1	4	11	8
Eupithecia	sp nr rubellicincta																		1
Eupithecia	sp nr rubellicincta						6	1					1		1	1				1	4	3	7	2
Eupithecia	sp nr saphenes						4	1	1	5	1		1	1	1	1				1
Eupithecia	sp nr sobria									1					2						4	2	1	2
Eupithecia	sp nr tenera																				3			2
Eupithecia	trampa																3			5	7	3	11	5
Eupithecia	triangulifera												2	1	1	4	1		1	6				1
Eupithecia	trigenuata									1			3	3	1	5		6	3	2	2
Eupithecia	versiplaga				1								2			3	1			1	5		2	2
Eupithecia	yangana						8	5	1	1	2	1	2		2	3	2	1	3	2	9	3	11	4
Graphidipus	flaviceps					1		1	2	1
Graphidipus	graphidiparia																			1
Graphidipus	puncticulata								1															2
Hagnagora	anicata								1	1		1	1	1	5	1			3	1	4	4	2	3
Hagnagora	croceitincta									1	1	1	2		1	3					1
Hagnagora	ephestris								1							1					1	1	2
Hagnagora	mortipax				1	2	1				11	1				1
Hammaptera	praderia						1		5	9	4	2
Hammaptera	probataria			1
Hammaptera	repandaria		1	1	1
Hammaptera	sp				2			1	1
Hydriomena	multangulata																	1		1
Hydriomena	praelatata						1	2
Hydriomena	ranuncula																					2		1
Hydriomena	sp			1	2	1										1					1	2	2	7
Hydriomena	sp				1	3
Hydriomena	sp nr algosa						1		1				1	2		2			1	1	3	9	19	28
Hydriomena	sp nr cydra				2		2			3					1		2			3			1
Hydriomena	sp nr polyphonta										1	1				1
LARENTIINAE	sp																						1
Leucoctenorrhoe	quadrilinea							1
Obila	floccosaria		1
Obila	umbrinata		3	1			2												1
Orthonama	coneja						1	2
Orthonama	effluata			1	2	2	1
Orthonama	majorata																							1
Orthonama	sp		1				2	1
Perizoma	arcillata																				1
Perizoma	basiplaga								1					1				1	1	2	3	2	3	6
Perizoma	brunneopicta													1						1	4	2	2	6
Perizoma	carnetincta																	2			3	2	3	1
Perizoma	cinerolimitata						1	1
Perizoma	emmelesiata					1	20	7			1		1		1					1			1	4
Perizoma	fallax														1			9	3	8	1	3	2	4
Perizoma	interlauta														2		1	1	1	3	1	1
Perizoma	sp														1				1
Perizoma	zenobia						11	6	1	2	7	2	4		7	1		2	8	8	2	7	1	3
Plemyriopsis	facetata									1
Priapodes	sp nr longipalpata											1
Psaliodes	albifascia				4	2	2	1			2	2	6	3	13	2	5		3	2		1
Psaliodes	albistriga											1		1			2		1	1
Psaliodes	analiplaga																						1
Psaliodes	annuligera																					1
Psaliodes	aurativena									2					1
Psaliodes	biconalis										1								1		1		1
Psaliodes	castanea				2	1			1				1									1
Psaliodes	catenifera		1		2	2	2	1	1		11	5	1		3	1		1		1	5	5		1
Psaliodes	cedaza						1		1	1	6	7	11	1	7	25	19	7	22	35	41	18	7	11
Psaliodes	confusa					1			4	2
Psaliodes	crassinota							1	1	2		1	1	2		8		1
Psaliodes	cupreipennis						2	1	1	2	5	1	2		2	1			1
Psaliodes	cynthia					1				1
Psaliodes	detractata									1	1	1	3		2	6		4	1	5	2		1	3
Psaliodes	endotrichiata																	1	1
Psaliodes	fractifascia				1
Psaliodes	fractilinea												1		1	1
Psaliodes	infantula																				3	1		2
Psaliodes	inundulata				1			1	4	5	6	1	5		2	3	3			1
Psaliodes	liebra							1								1	1	3		1	4	4	2	3
Psaliodes	lignosata																				1
Psaliodes	magnipalpata							1							1			1		1	3	2	1
Psaliodes	miniata			1				2			5	2	6	2	1	5	1	1	2			1		1
Psaliodes	nexilinea								1		1
Psaliodes	nictitans					1		1		1	1		5	2	13	16	10	2	6	4	1	1
Psaliodes	nodosa														2				1	2			1
Psaliodes	ocreata			1			3	2	5	2	20				1	2	1		2		2
Psaliodes	oleagina				1		1									1		1		1	1	3	1	1
Psaliodes	olivescens																							1
Psaliodes	ossicolor		1	1			1								1							1		2
Psaliodes	perfuscata						1				2	3	3	2	6	4	16	4	17	18	4	5	4	9
Psaliodes	pervasata													2
Psaliodes	picta			1	2		1		1	6	2	3	2		1
Psaliodes	plumbescens			1												1
Psaliodes	rica			1								1	1			7	2	2		1
Psaliodes	samaniegoi																					1		1
Psaliodes	semirasa								1	1	8
Psaliodes	sp						1	1		1	2	2	3	2	2	8	2	1	5	3
Psaliodes	sp																1			3	1
Psaliodes	sp																				1		4	1
Psaliodes	sp																					1
Psaliodes	sp																							3
Psaliodes	sp				1				1	1
Psaliodes	sp																			2	7	4		4
Psaliodes	sp												2			5			1
Psaliodes	sp								1	1					1	1		1	1		2	3	1	1
Psaliodes	sp nr cedaza													1		2	4		2	4	6	1		1
Psaliodes	sp nr cedaza									6	5	8		2	7	1	1	1			2
Psaliodes	sp nr cedaza							1
Psaliodes	sp nr conimaculata															1					1
Psaliodes	sp nr crassinota																		1	1		2	5	5
Psaliodes	sp nr crassinota				1		1
Psaliodes	sp nr cronia						1				1
Psaliodes	sp nr disrupta							1		2					2		3					1
Psaliodes	sp nr disrupta												1	1		7	1				1
Psaliodes	sp nr endotrichiata											1	1		5	4	11	5	21	11	5	3	2	5
Psaliodes	sp nr inundulata		1		2	2
Psaliodes	sp nr picta													1	1		5	1	6	5	2	3	1	4
Psaliodes	sp nr planiplaga															1			1		1	1	1	1
Psaliodes	sp nr semirasa																1		1	4	4	8	3	3
Psaliodes	sp nr simplex																							1
Psaliodes	sp nr tripita						8	2		4	2				2
Psaliodes	strigosa									1
Psaliodes	trilunata										1	2		2		2		2	3	1	19	9	5	6
Psaliodes	tripartita			2
Psaliodes	tripita																1			1		1
Ptychorrhoe	blosyrata confirmata		1								1
Ptychorrhoe	rayada				1	1
Rhinura	populonia				2		1
Rhopalodes	ligereza																						1
Rhopalodes	sp										1		1		5	6	2	3	4	1	2	1		3
Rhopalodes	sp nr concinna			3
Smileuma	plagifracta														3
Spargania	caudata																							1
Spargania	cultata								3	2				1
Spargania	flavolimbarioides																			1
Spargania	leucocyma																					1	1
Spargania	narangilla					1			2	4	2	2	2	3
Spargania	sp					2
Spargania	sp nr flavolimbarioides													1		1
Spargania	sp nr intensa									1			1
Trichorrhages	pizarrena												1
Trichozoma	albidulata																					1
Trichozoma	picaria				2		2	4
Triphosa	affirmata								1	1							1
Triphosa	pallidivittata										1
Triphosa	sp																		1
Ergavia	roseivena		4	4
Racasta	rhodosticta										1									1
Racasta	spatiaria			1	1										2	4	2			1	1			1
Acratodes	sp				1
Cyclophora	acutaria						1	3	3		1
Cyclophora	coecaria		1		3	3	1					1
Cyclophora	sp											1
Cyclophora	sp						1
Cyclophora"	albidiscata					1
Cyclophora"	aurantiata aurantiata												3	3
Cyclophora"	costinotata																		1
Cyclophora"	fastidiosa																					2	1	3
Cyclophora"	flavicornis						1								1
Cyclophora"	gigantula									1		1									1
Cyclophora"	globaria							1	1				2	2			1				1		1	3
Cyclophora"	gracililinea								1		1	2	4		7	5		1	1				1	4
Cyclophora"	granillosa												1	1	2	1	2	2	2					1
Cyclophora"	griseomixta griseomixta													1	3
Cyclophora"	lancearia													1	1					1
Cyclophora"	rhodostigma																1	1					1
Cyclophora"	seposita																			1
Cyclophora"	sp															1
Cyclophora"	sp		2
Cyclophora"	sp			1
Cyclophora"	sp nr melitia			1
Cyclophora"	sp nr scintillans											1
Cyclophora"	sp nr torsivena						1
Cyclophora"	sypharia			1							1	1		2	1		1			1
Cyclophora"	torsivena			1		1	1		3		1	2	4		2	2	1
Cyclophora"	viator																				2	1	1	1
Dithecodes	distracta			6	10	8	2			1
Euacidalia	angusta					2
Idaea	arhostiodes			1		1	2		1	2	1
Idaea	fimbriata				2				1	1			1
Idaea	geminata		1
Idaea	quadrirubata			1	2		2	2							1
Idaea	recrinita			2	3		1	4	7	7	24	11	57	22	58	60	29	15	36	43	2	1
Idaea	sp			2
Idaea	sp		1		1
Idaea	sp																				4	1	3	1
Idaea	sp nr caudata			1
Idaea	sp nr iridaria						1	1	22	4	15	3	4	3		1
Idaea	sp nr pyraustaria			1
Idaea	sp nr subvestita			3	1		1		1	1		1
Idaea	sp nr triangulata			1	2	1									1					1
Idaea	xanthodeta																				6	5	1	3
Lobocleta	costalis		1	3	5	1		2	1	2
Odontoptila	mimica							1
Pleuroprucha	sp		3	1																			1
Ptychamalia	nubila		1	2		2
Scopula	privata					1
Scopula	sp									1
Scopula	sp			1			1			1			1
Scopula	sp							1
Scopula	sp nr subquadrata				3	1	3	5	1	1	1	1	1
Semaeopus	bimacula				30	19
Semaeopus	calavera		1	2		1			1
Semaeopus	dentilinea			1						2				3	3		1			1
Semaeopus	hypoderis			1
Semaeopus	ladrilla												2						1		1		1
Semaeopus	miniata			4
Semaeopus	semibrunnea			1
Semaeopus	sp		1
Semaeopus	sp									2	1
Semaeopus	sp				1
Semaeopus	verbena														2		1			1
STERRHINAE	sp																				1
Tricentra	commixta		1		1
Tricentra	gavisata			2								1
Tricentra	sp nr ascantia													1					2
Tricentrogyna	collustrata				1	1	2	3		1	2						1	1		1	1		1	1
Tricentrogyna	nigricosta		1		3	2		1			4			1

## Sheet: Second study
		Elevation (m) —>	1020	1025	1025	1120	1130	1213	1343	1470	1530	1800	1800	1850	1878	1880	1953	2010	2118	2157	2180	2212	2590	2630	2670	2677	2897	2916	2938	3021
Species Nr	Genus	Site code —>	19	20	29	40	41	48	49	45	46	1	8	99	34	33	32	30	39	38	12	5	60	61	17	18	50	51	70	71
1	Cyclophora"											1
5	Cyclophora"											1			1						1
6	Cyclophora"											1													2
7	Bassania													1				1	1		1				1
8	Cyclophora"			1																					1
9	Patalene										1										1	3
10	Thysanopyga						1	2
12	Cyclophora"																				1	1				1
13	Cyclophora"																						6	2	9	2	1	1
16	Cyclophora"												1								1	1
17	Cyclophora"																	2
18	Cyclophora"									1	1		1							2
19	Thysanopyga		2		1
20	Semaeopus			2	1													1			1
21	Semaeopus																	1
22	Semaeopus									1	1										2				2	1
23	Semaeopus													1							1
24	Semaeopus			2
25	Scopula																1
28	Cyclophora											1
29	Cyclophora				1								2					1
31	Idaea									1
32	Isochromodes																	1
34	Idaea									3	3	3			1	1		1		3	10	13
35	Idaea					1	1					3				1	3				1
36	Idaea																	1
37	Idaea			2				1		1
38	Lobocleta												1
39	Tricentrogyna					1		1				1																2
40	Idaea			1	1		1														2	1
41	Idaea			3									1				1
42	Tricentrogyna																							1	2	4	4	2	3
43	Tricentra												1
44	Dithecodes		1										1
45	Phyllodonta																				14	32				2
46	Phyllodonta																	1			4	4		1	1	1
47	Phyllodonta																				12	5				1
48	Phyllodonta											2							4			1
49	Phyllodonta											1	6		1	2				1		1
50	Phyllodonta															1					1	7	1			1
51	Phyllodonta		1	1	1
54	Bassania																									1
55	Bassania																					1
56	Bassania																			1					4	1	17	8	2
57	Bassania																				1				1
58	Oxydia		1	1			1	2				6	10	3	1	7	7	25	14	24	22	19		1
59	Oxydia											1	5	2					4	1		4		1				1
60	Oxydia																	1	1	3	7	5
61	Oxydia															1		1	1
62	Oxydia			1				1	1	1					1			1
63	Oxydia											1								1
64	Oxydia			4				4	1		1		1
65	Oxydia																				2	7			1
66	Oxydia																		1	1				1
67	Oxydia										1
69	Acrotomia																				2	1			1
70	Hygrochroma																	2				1
71	Oxydia											1	1				1	3	14	1	3
72	Oxydia		4	3				2		1																1
73	Argyrotome		3	2		1				1		24	52	8		2		6		2	3	6
74	Cargolia												1					1	9	8	2	5
75	Cargolia								1	1		10	1	1			5	7	1		1
76	Bonatea		3	14	11		1	4				21	27	6	14	1	1	4	6	5	11	1					1
77	Bonatea																					1	3	1	2	3
78	Bonatea									1	5	2		1							7	10
80	Bonatea																			2	6	22
81	Bonatea																						2		4	4
82	Herbita group 3			1				1									1	3		1	2	3
84	Herbita group 2																				11	13	1		14	11
85	Herbita		4	1						1											4	16			1
87	Herbita group 3				1			1											1								1
88	Herbita group 3		4																3
89	Prochoerodes																1	1		1	11	14			1
90	Cimicodes														1			2	1		1
91	Sphacelodes		1	3	2	1	1	7	13		2
92	Sabulodes															1	1	1	7	3	12	2					4	3
93	Sabulodes											1	1	3	2						1
94	Certima																					2
95	Certima									1		1	8		8			2	7									1
97	Certima												1		1				1
98	Isochromodes																			1	16	39
99	Isochromodes"									1		1		2			1	3	1
100	Psaliodes																								1
101	Isochromodes																				1
102	Isochromodes																	1	1	2			1	4	1
103	Isochromodes																1	3	1	1
104	Aenictes															1				3	1	1					2	2
105	Isochromodes																2	3		2
106	Isochromodes																				7	20				4
107	Isochromodes											1						1	1	1	1	4			6	7
108	Isochromodes																1	1	2	5	3	1
109	Isochromodes						1					1	1				1	8	3	7	2					1
111	Semaeopus			1						1
112	Isochromodes															1	2	1	3	3	5	30				1
113	Isochromodes																									1	19	11
114	Mimosema														1	3	1		2	2			1					1
115	Isochromodes																					2
116	Isochromodes																				3	3		1	7	5	1
117	Isochromodes																				2	1
118	Isochromodes																						1		3	7	6	1
120	Perusia																				2	6		1
122	Sabulodes														1					1
123	Cyclophora																					1
124	Petelia"																								1		4	4
125	Sabulodes			1				1		11	1	54	45	3	1	3		1	9	5	7	4		1	3	3
126	Cosmophyga												1			1		2	4	2	1	4			1
127	Cosmophyga																							1	1	2
128	Phyle																					1			1	10	2	2
129	Mimosema																										12	14
130	Nematocampa			1						1	1	3	3			1		6	1
131	Oenoptila"																				4	16	1		4	12
132	Oenoptila"																				1	1
133	Certima											3	1					1
134	Perusia																					2				1	18	7	1
135	Perusia		1	1								5	1
136	Perusia																1	1	5	4	1
137	Phyllodonta											1			3	2			4							1	9	4
138	Petelia"																							2	13	1	15	13	3	1
139	Petelia"																					1
141	Oenoptila									1											1				1
144	Oenoptila																					1
145	Oenoptila																					1
147	Petelia"																				1	1
149	Isochromodes									2		1										9
152	Petelia"											2	1													2
154	Perissopteryx											1
155	Petelia"																				1	2
156	Petelia"																								1
157	Lobopola																				2				1	1
158	Petelia"																				1				2
159	Microxydia											1	1				1
160	Melinodes																				2	2			1
161	Melinodes"																	1							3
162	Periclina												1		1			1	1	2						1	3	1
165	Periclina												1	1						3
166	Mychonia											2	1						1		2	2
168	Mychonia														1							1			1
169	Hemixera											1															8	2
170	Neazata																				2	2
171	Oxydia		1	8	1	1				1		1
172	Macaria											4						2								1
173	Macaria		1	1						1		1
174	Macaria																	1		1
175	Semiothisa									1						1		1
176	Semiothisa"																				2	2
177	Mesedra												1		1			1		1
178	Mesedra												1					1
180	Mesedra											1	2			1			2	1	7	5
181	Eusarca											1	3			1	2	4	2	41		1
182	Mesedra											1
183	Campatonema													1				1
185	Eusarca									1
186	Mesedra																								9	8
187	Lomographa											1	1		1		1	2			3	11
188	Lomographa																					1			5	7
189	Lomographa																		1		1			1
190	Lomographa												1				2	2	4	6	25	8
191	Lomographa																			1	1	7
192	Lomographa											1					1		3	2	2	4			4	1
193	Lomographa																1				5	3			3	2
195	Racasta												1
196	Racasta																				1
197	Pherotesia																				6	1
198	Pherotesia								1																4	1	2	1
199	Melanolophia"														3		1	2	10	5	11	2				1
200	Cyphoedma"		1								1	1	1									2
201	Acrotomodes																	1				1
202	Sericoptera											3	2								1	6
203	Nephodia															2		1	13	7	3	6
204	Nephodia"											2	1	1		3		1		1	1
205	Nephodia		1									2	1	1
206	Nephodia											1	21
207	Nephodia														1	5						2			1	2	8	5
208	Nephodia"																					2			2
209	Nephodia													1	3	2		5	1	2
210	Nephodia															1									3	2
211	Nephodia																				1
212	Nephodia													2						3
213	Nephodia"		1	1						2			1	1
215	Mychonia																				1		1	1	1	3	27	25
217	Tarma									1
218	Nephodia																4	2
219	Melanoscia																		3		3	2			1
220	Melanoscia															1		2	2	1	2
221	Astyochia					3						2	3		3	2			1			1
222	Nephodia																	2			3	1
223	Astyochia												8		1							1
224	Astyochia				1																	2
225	Phrygionis		1									2	5	1	2	2	1	2
226	Phrygionis											1									8	2
227	Phrygionis			2	1											1		1			1	1
228	Opisthoxia														1		1	1			1	1
230	Pityeja												1						1		1	4					5
231	Opisthoxia											1			1	1		2	1	1	2	1
232	Opisthoxia											1							1	2		3
236	Opisthoxia											1					2
237	Pero											12	3		5	2	1	4	5	5	1	5
238	Pero																			3	5	7			4	1
239	Pero								1	2		14	33	1	1	1		5		6	1	3						1
241	Pero											1			1						1	2			17	8
242	Pero																				1	4
243	Pero												1								2	2
244	Pero			1						1		1
245	Pero											5	7
246	Pero																							1	1	1
247	Pero			1	1							11	30	3									1		6		7	4
248	Pero																								1	3	6	8	1
249	Pero		3	1								1						1		2	3	4	2
250	Pero																					2
251	Pero																1
252	Epimecis		1												2	1		3	2
253	Certima																	1			2	3
254	Bassania"							2					1	2				1			1	1
255	Acrotomodes																							2	7	5	2	1
256	Iridopsis																		3	1	5				1	1	4	3	1
257	Iridopsis		17	17	9
258	Iridopsis												1					1	3	4
259	Iridopsis		4	2
260	Iridopsis			2
261	Iridopsis																									1
262	Iridopsis			2					2	1		1				2	1	1
263	Iridopsis											4	1		6	1		2	2	1	1
264	Pero		1	2
265	Glena											1	1		2				2					1
266	Bryoptera			1								2			1	4
267	Bryoptera								1			2	2				2	3	3	2	6	4
268	Bryoptera		1	2	1		3	1	1	1		3	2
269	Melanolophia														1						1				1	3			1
270	Melanolophia				1														1							1
271	Melanolophia																				4				10	9	1	2
272	Odysia																								1	1	9	5	1
273	Bryoptera											5	5		1
274	Bryoptera									1	1							5
275	Physocleora									4		1	2		2			1
276	Hymenomima									1
277	Physocleora														1
278	Odysia"		7	5		2		1	1
279	Physocleora															2	4	3	3	2	1
280	Physocleora			1						1				1				2	1
281	Physocleora																				2	3			1	1
282	Physocleora																		4	1	1			1			1
283	Physocleora		1	1				1
284	Odysia																		3	2						1
285	Physocleora														1							1	1
286	Neodora									2		2	2	1	1		2	8	5	7	5	8						1
287	Neodora																					3		1	2		1	3
288	Cirsodes												1								1	1		3	19	24	4	9
289	Cirsodes																				2
290	Cirsodes																					1		1
291	Cirsodes													1						1	5	11					1
292	Apiciopsis"											1									1	1
293	Cirsodes		1
294	Cirsodes									1											1
295	Furcijuxta							1	1
296	Furcijuxta															1			1
297	Pantherodes			1			1																	1	2	1		1
298	Pantherodes											4	2								2				3
299	Nephodia											2	1					1		1
300	Leuculopsis																								1
301	Leuculopsis												1											1	3	1
302	Leuculopsis												1								3	6
303	Nazca																			1	26	35	4		5	14
304	Aragua																1				11	1			5	7	4	1
305	Charca																			1	1				1		2	3
306	Charca																				3	10
307	Charca																		1		1	1
308	Ischnopteris									1										1	4	1
309	Rucana			1						1								2		1
311	Rucana										1					2
312	Patalene																				1	2			1
313	Patalene																					5			6	9
314	Eutomopepla											3	5
315	Pyrinia															1
317	Pyrinia						1			1		1	2			2		2	3	3	1	2	5	6	1	3
318	Pyrinia											1					1	7
319	Semiothisa"											3		1					3
320	Pyrinia		1					1		1	1		1
321	Scopula											1	1
322	Loxaspilates"											2	1		1	6			1
323	Pyrinia			1						2	1							1
324	Oenoptila														1							4				1	1	1
327	Perusia																				3		1		17	7	27	7
328	Perusia											1			1
329	Microxydia															1		1			1	2	1		2	6
330	Microxydia											9	1	2					1
331	Melinodes		1									1	8			2		2	3	4	1				1	1
332	Nematocampa"																		1	1	2	3
333	Physocleora											5	3				5	11	1	24	3	2
334	Physocleora												1					3	1	3	2
335	Physocleora								1
336	Physocleora											3	3					1		2
337	Physocleora			3			1			1			1
338	Callipseustes											1	6					1										1
339	Callipseustes		4		3			1		3
340	Nemoria												1			1				1
341	Poecilochlora											1						3	2
342	Rhodochlora											1				3		5	2	2	4	1
343	Hyalochlora															1		1			1
344	Oospila											3	1					2	6	6	1	1
345	Nemoria			1								17	3	1
346	Nemoria		1	1				1				4	3					1
347	Synchlora											3	2	1		1				1	2
348	Lissochlora																						3	1	2	1
349	Nemoria																				1	1
351	Lissochlora																					1
352	Lissochlora											1				2	6	13			18	7				1
353	Nemoria											1		1		1		2		2	2	1			1
354	Lissochlora		4	3	1			1		1								1
355	Nemoria											2	1		2			2	1	1	7	4			3	1
356	Nemoria		2	3				3
358	Chloropteryx							4			1	5	12		2						1	1						2
359	Telotheta		1	1								9	7				2	2		1		1
360	Phrudocentra																	2		1				1	1
361	Phrudocentra									1
362	Oospila											1						1
364	Chavarriella														1			1
365	Oospila												7			1					1
366	Oospila							1		1								1
367	Oospila												1		1
368	Hydata														2
369	Hydata									2				2			1	1
370	Cathydata		1	1	1			3	1
371	Neagathia		1	2							1
372	Tachychlora			2	1				1
373	Odontoptila		1										1
374	Eois											2			6	1				2	12	3				1		1
375	Eois																										79	99
376	Eois							1					1
378	Eois																											3
381	Eois															1			1	2		1
382	Eois											1								2	1
383	Eois															1			1	1	1			1
384	Eois		1	1
385	Eois											1			1	2				4			1
386	Eois																						1	1	1	2	22	5		1
390	Eois														1	1	1	1		1	1			1		3		1
391	Eois									1
392	Eois																	2	2	1
394	Eois		1									4	2						1	1
395	Eois																		1
396	Eois							1							2						6
397	Eois														2						11	15	1		9	16
398	Eois				1					1		1			3	1			1	1	3	1
399	Eois										1							1		1	7	1			1	2	2
400	Eois																				1
401	Eois			1	1				1			10	8								1
402	Eois																				2	1
403	Eois											1					1	3
404	Eois		1					1
405	Eois											1
406	Eois																				1		6	1	22	31	2	2
407	Eois																				1					1	26	39
408	Eois												1		1
409	Eois											1
410	Eois																				5	2
411	Eois							1	1							1	3	2
412	Eois											2	2
413	Eois			2	2			1
414	Eois																		2	1		1
416	Eois								1						1
417	Eois		1	6	1		1	1													1
418	Cyclophora"															1
419	Eois											5						1
421	Eois																	2
422	Eois		14	1																					1
423	Eois																									1
424	Eois											2	1					1									1
425	Eois											4				1	1	2	1	1
426	Eois		5	8				1				1	1
429	Callipia																									1
430	Graphidipus											6				5	1	1		2						1
431	Graphidipus																										12	8
432	Graphidipus		1	1								1	1						1								7	4
433	Hagnagora											1										2			2	1		1
434	Hagnagora											1		1		2		1		2	5	3
435	Hagnagora																3				28	6			2	1		1
436	Hagnagora											2				1		6	1			1
440	Triphosa														1					1
441	Orthonama												3
442	Orthonama											2	2
443	Rhopalodes																				2		1		1	1	4	2
444	Ptychorrhoe														1
445	Orthonama											4	4
448	Spargania																											1
449	Distoneura												2
450	Orthonama																							1			6	2	3	2
451	Spargania		2	1					1
452	Euphyia																	1
454	Spargania																	1	1
455	Spargania																					1
457	Euphyia								1									1
458	Deinoptila																				1
459	Deinoptila																									2
460	Euphyia		2	2									1			1									3	1		1		1
462	Euphyia																	1		4			1		1		5	3
463	Euphyia														1			1				2			3	1	30	16	1
465	Euphyia																	1			1						1	1
466	Euphyia																				1	3
468	Hammaptera											1	1
473	Euphyia																								2	1		1
474	Hydriomena																					1
475	Hydriomena											3	1					1				1	1		2	2
476	Hydriomena											1								2	1	1			27	25	24	4
477	Hydriomena																				1	2
478	Hydriomena																								7	4
479	Hydriomena									1			3		4				1
480	Euphyia																							2	6	2
481	Triphosa																										1	1
484	Euphyia																									1	3	1
485	Perizoma																				1				1
486	Perizoma									1		18	13							1					1
487	Perizoma											4	9		30	5		4	4	11	3	10			4	1
488	Psaliodes											1	4								1
489	Psaliodes											1			1			1			6	1
491	Perizoma																								1	3
492	Perizoma																										2	6
493	Perizoma																								5	2		3
494	Perizoma																										2	4	1	1
497	Psaliodes											3			6	1	3	3	6
499	Psaliodes																								1	2		3
500	Neofidonia																2
501	Psaliodes																					1
502	Psaliodes																							1	1
504	Psaliodes																						1		6
505	Psaliodes																						1
507	Psaliodes																								1
508	Psaliodes																								4	6
510	Psaliodes														1										1		1
513	Smileuma																					1
515	Eois												1
517	Psaliodes			1
518	Psaliodes																	1	4	1
519	Psaliodes																					1
520	Perizoma																								1	2
521	Psaliodes									1															1
522	Eupithecia															1	1								1
523	Psaliodes				1
526	Psaliodes											1
527	Psaliodes											1										1	1	1
528	Psaliodes																				2	2
529	Psaliodes																				1	2
530	Psaliodes																								2
531	Psaliodes																						1			1
532	Psaliodes																	1			1	2
533	Psaliodes																								1	2
534	Psaliodes		1	1								1								4	3
535	Psaliodes																								1	1
536	Psaliodes																		1
538	Psaliodes												1					1
539	Psaliodes											1	1					1			1	5			5	2	1
540	Psaliodes											11	5				2	4	1
541	Psaliodes																								1	1		1
542	Psaliodes																					1
543	Psaliodes																		1
544	Psaliodes											1
545	Psaliodes											2						1			1	1
546	Eupithecia																									1
550	Eupithecia												1									1			13	13	5	3
551	Eupithecia											1	1								1			1	7	20		1
552	Eupithecia											6	1			2				1	3	4			3
553	Eupithecia																1			2	2			2	8	1	1	1	1
554	Eupithecia														1
555	Eupithecia																				1	1
556	Eupithecia												1			1		1	1	1	2		1	5	32	3	8	15	46	62
557	Eupithecia																					2			2	1		1
558	Eupithecia																				3		1
559	Eupithecia																				2	1	2	1	5		1	2
561	Eupithecia											4	1					1			3
564	Eupithecia																								2
566	Eupithecia														1
567	Eupithecia																							2	1	2	2	2
568	Eupithecia														4	1			1		2	2			2
569	Eupithecia												2									1
570	Eupithecia												2		1							2			2	3			1
571	Eupithecia				1																	1		2	3	5	6	7
572	Eupithecia											1	2					1			3	5
574	Eupithecia			1								2	5								5	5			2	7
575	Eupithecia														4	1			1					1	1		2	1
576	Eupithecia															1						1						1
577	Eupithecia																					2			1
578	Eupithecia											5	3		6	2			1		22	12			1
580	Eupithecia																1									1
582	Eupithecia																								1
583	Eupithecia																							1	3	5
584	Eupithecia														1					2		3		1
586	Eupithecia											2			1	1					3	1				2
587	Eupithecia		1
589	Eupithecia		2	1
590	Eupithecia																					1		2	3	2	11	18	3	3
592	Eupithecia																								9	1
593	Eupithecia																								2	2		2
598	Eupithecia														3					1	3				9	2	2	2
599	Eupithecia															1
601	Eupithecia																										1	1
603	Eupithecia								1	1		1					2
604	Eupithecia											4	2			2	1				1	1					1
605	Eupithecia												1								1				4		7	8	4	1
606	Eupithecia												1			1	1	1			1			1	5	6	1	1
607	Eupithecia											1						1					1		1
609	Eupithecia											4	15						1				9	3	8	2	1		6
611	Synchlora											7	4	1				4	9	9	2	1
612	Macaria		1	5					1
613	Lomographa		1							3
614	Eupithecia												1
616	Eupithecia																				1
618	Eupithecia																				1
619	Eupithecia															1						6	1		5	2	2
620	Eupithecia																								2	1		2
621	Eupithecia											1												1
622	Eupithecia											1												1	1	1
623	Eupithecia											3	2
624	Eupithecia		1
626	Eupithecia											2						1				1
628	Eupithecia																								9	3	1
629	Eupithecia											1									5	3
632	Eupithecia																					1
634	Idaea				1					2	3
635	Eupithecia											1							3	1			1
636	Eupithecia																	2
637	Eupithecia		1										1		1								1		1	1		5
640	Eupithecia																					1
641	Eupithecia																	1	4	1			1			1	5	7
643	Eupithecia																								10	2			1
644	Paragonia		2	7	1	1	4	12	1	3	1
645	Eupithecia											2
646	Eupithecia														1		1	1			5	2
647	Eupithecia																						1	1
648	Eupithecia																				3	4
649	Patalene																					1				4
650	Eupithecia											1						1				1
651	Eupithecia																					3			10	2	2	2	2
652	Eupithecia																								2
653	Eupithecia																			1						2	1	2
654	Eupithecia												1									2			1
655	Macaria		3	4	1
656	Eupithecia											1									1
657	Eupithecia																							1	12	3	2	3		1
658	Eupithecia																				2
659	Eupithecia											1									2		1	1	12	6	2		1
660	Rucana												1			1		1
661	Eupithecia		1							2		10						1		1	2	2			1
662	Eupithecia											1								1	3	6	1	1	1	2
665	Eupithecia																					1			13	3
667	Eupithecia											21	22		5	2			1			1	1	2	1	2			2
668	Isochromodes																							2	1			1	1
669	Eupithecia											1						1
670	Eupithecia																								3	1	2	5		2
671	Eupithecia											1	4						2	1		3			7	3
672	Eupithecia											1										1	2		7	1
674	Eupithecia									2		5	2		1	1			7	2	1	1	1	1	2	1	1	1	2
676	Idaea		2	6	4		2	1		1
677	Eupithecia											1	3
678	Eupithecia															1			2	1			6	18	20	10	1
679	Eupithecia																					1						1
681	Eupithecia																				1	3			2	2
683	Eupithecia																	1			8	2
684	Isochromodes											1						2	1
685	Macaria											1
687	Mesedra												1						3
688	Nephodia			1
689	Sicya												2
690	Lomographa											2	2		2	2	1	3	1		4	4
691	Lomographa											1						2			1	3					1
692	Hydata																									1
693	Isochromodes											1		1			1			4	4					1
694	Ischnopteris"		2		1			1		2					1	1
696	Eois																						4				1	3
697	Euphyia																					2			2		1	2
698	Psaliodes														1		1	2			3	4
700	Nephodia		1
701	Psaliodes																								2	2	1
702	Eupithecia																								3		5	3
703	Eupithecia																							1	2	3	1
704	Trichosterrha																				1
706	Eois							3	2
708	Eois											1
709	Eois											1
710	Eois		2
713	Semaeopus			2				2		1	1
714	Tricentra			3		1		1
716	Pherotesia									1
718	Charca											1
719	Ischnopteris"																									1	1
721	Chavarriella			1
722	Myrmecophantes		1	2											1
724	Ischnopteris"				1					1
725	Stegotheca			1
727	Nematocampa		10	2	2			1		1
728	Semaeopus			1
729	Macaria			1
730	Iridopsis		30	41	10	1	4	2		3							1
731	Hymenomima					1					1
732	Periclina			1				3						1	1			1
733	Pyrinia										1
734	Pyrinia		1	7		1	1		1
735	Nephodia"		16	17	1
737	Phrygionis							1
738	Fulgurodes			2
739	Eois		2	6	1	1
740	Aplogompha		30	79
741	Aplogompha		2	14
743	Leuciris		10	6							1
744	Leuciris		1	1
745	Ballantiophora		3	2
746	Epimecis																								1
747	Iridopsis"						1	1
748	Iridopsis		2		1
749	Certima			1						1
751	Eusarca		5	9				1	3	1	1
752	Crocallis"							1
753	Melinodes		1		1					2
755	Cratoptera		2
756	Synchlora							1
757	Nemoria									1
759	Sabulodes		1				1						1
761	Lissochlora											6	4	2		2	4	7	2	2	1	3			1
762	Opisthoxia			1				1		3	1
764	Macaria			1
765	Melanolophia		3	3								1	1
766	Semiothisa			1					1
767	Macaria			1
768	Macaria																									1
769	Nephodia		5	2
770	Nephodia				1							1		1				8	1
771	Nephodia				1				1
772	Nephodia		1	1
773	Nephodia									1										1
774	Budara												1					2	1		2
780	Bryoptera											1	1
781	Hymenomima																		2
784	Macaria		10	4	2	1		2
785	Patalene			1			1	1
789	Spargania																	1
790	Mallomus											5	8		1						1				1			2
792	Pero											1		1				1
794	Pero			1			3
799	Eois																	1	2	1
800	Callipseustes							1
801	Nazca Nazca																										7
802	Phaludia																				1	2
803	Eois		2	2				2		1							1	4	1
804	Tricentra				1
805	Microxydia											2			1
807	Nephodia			1
810	Nephodia												1				1	2
811	Euphyia												1
812	Perusia												2						1
813	Euphyia											1
816	Eois																1
818	Eois											2
819	Nemoria																		1
820	Eois														1				4	3							1
821	Carpella									1
822	Aplogompha			2					1
824	Ergavia		6	3	1
825	Isochromodes																									1
826	Oxydia			1				1	1
827	Lissochlora		3	2		1			1			1
828	Isochromodes											1	2										1		1	4
829	Isochromodes																					4				1
830	Euphyia		19	29									1					1
831	Pero		2	2
833	Pero		1							1		1						1	1	2
834	Pero		2	1			1	1
836	Eois								1			1
837	Eois		1	7	1	1		2	1	2
838	Mimosema		1	2								3	5	1	3	2		1		1
839	Pyrinia											1				3		4
840	Physocleora		1	6		1	1	5
841	Euphyia																								1
842	Isochromodes																1	2
843	Cyclophora"			1				1
846	Melanolophia																								1	1
847	Nephodia																								7	2
848	Nephodia																								1
850	Hydriomena																								3	1
851	Eois																							1	5	2
852	Lissochlora																				1	1			2	1
853	Eois																									5	2	11
854	Eois																								9	3	8	15	2
855	Eois																											1
856	Lomographa																						3	1	4	4	32	29
857	Brachyctenistis																								1	1	1
858	Cirsodes																						1		4	7	1
859	Isochromodes																								5
860	LITHININI																				1	1			3	1
861	Narragodes																				1	1
863	Psaliodes																		1		1
868	Opisthoxia			1
869	Nemoria					1		2		1
873	Sabulodes"											2	2
874	Eupithecia												1											1	6	2		1
876	Eupithecia																				1		1	2	8		6	2	1	3
877	Eupithecia																							1	2	2
878	Eupithecia														1			1								1			1
879	Eupithecia																						1	3	3	1	10	17
881	Psaliodes																										2
882	Nemoria								1	1								1
885	Physocleora			4				3	1	5	1
886	Physocleora		7	7	6	5	8	2
887	Physocleora											2
888	Physocleora			1			1
891	Idaea			1
892	Eupithecia			1
896	Eupithecia																							1			1	1
901	Eupithecia		25	8	2			2				1	3
903	Nematocampa"		1	5			2
905	Physocleora		2	2
907	Physocleora																	2		1					4	3	1	2
909	Polla							1				1
910	Epimecis			1
911	Epimecis			1				1										1
912	Perissopteryx									3	1
913	Thysanopyga"		1		1
914	Eois																										3	3
915	Perusia																		1					2	2	3	6	8
916	Melinodes"											1			2		2	2		4					1
917	Anisoperas		4	1	1			2			1
919	Eusarca																3			1						1	3	5
920	Trotogonia								1
922	Mychonia																					1	1	2	13	6
923	Melanolophia		3				1
924	Pero																						2		1		2		1
925	Pherotesia								1			1							2			1
927	Macaria												1
929	Lomographa						1
931	Aventiopsis						1
932	Physocleora									1					1				2
934	Sabulodes"																1
936	Certima																							3			1	3		1
937	Mallomus																		1						2		36	17
939	Hygrochroma		1	1						3	1		1			1		2
940	Herbita group 3																	1	1		1
941	Acrotomodes																								1	1
942	Pero		5	15	1	3				2	1
945	Erosina																							1
946	Postazuayia																							2	1		11	19
947	Pero													1												5
948	Phrudocentra		2
949	Phrudocentra			1
950	Nephodia									1
951	Obila			3	1								1								1
952	Euphyia																									1		1
954	Euphyia																	1			1
956	Hammaptera		1
958	Hydata																								1		3	4
959	Chloropteryx			2								2	1	1				2	1
960	Chloropteryx		2	4		1		1
961	Eois			1						1										1
962	Nemoria			1
964	Nemoria																								1
965	Chavarriella																								1	1		2
969	Idaea												1
970	Idaea			1	1	2					1
971	Idaea																								1	1
972	Pleuroprucha		6						1
976	Eois																						2
978	Rucana									2
980	Psaliodes							1
982	Trichozoma																	1	1
983	LARENTIINAE																											1
986	Hammaptera												1				2
989	Perissopteryx																			1
990	Sabulodes																								4	4
991	Sabulodes																					5
992	Isochromodes																		1					2	1	2
994	Petelia"																								1	4	2
995	Perissopteryx							1	1	1	3										1
996	Ophiogramma			4				1	1	2
998	Oenoptila																								1	1	2	10	1
999	Thysanopyga"										1
1000	Semaeopus											1
1001	Perissopteryx																				1
1002	Oenoptila																									1
1005	Thysanopyga"				1
1006	Certima					1		1		1
1007	Patalene			1							1	1				1				1		1
1009	Psilosetia			1	1					1
1012	Herbita group 1							1
1016	Salasaca		1	1						1								1
1020	Rhopalodes																											1
1021	Nephodia																					1
1022	Nephodia"															2		3	1
1023	Eois																	6	2	2
1025	Petelia"											1										1			2		1	1
1026	Plemyriopsis				1							3	1
1027	Nephodia		2				2	1	1
1028	Nephodia																								1
1029	Eois											2	3		2		3	5		3
1030	Leucula									2
1031	Astyochia																										19	18
1032	Nephodia"							1
1034	Nephodia																								1	2	5	8
1035	Ptychamalia										1
1036	Acratodes		2	4		1	2	1		1
1038	Cyclophora"		1
1039	Cyclophora"		2	1
1041	Eois		1	1
1043	Euphyia												1
1064	Smicropus			1
1069	Psaliodes																								3
1071	Lissochlora		1	3	1			1		1	1	3		1		1	1	2
1072	Melanolophia											1
1077	Scopula		1
1079	Cyclophora"														1
1084	LARENTIINAE		1
1087	Perigramma			2				1
1092	Nephodia									1
1093	Budara																		1			1
1094	Nephodia																									1
1095	Acrotomodes																	1
1098	Pyrinia																								3	6
1099	Pyrinia																					3
1106	Isochromodes		2	3
1108	Isochromodes			1
1110	Isochromodes																						1				2	2	2
1112	Eusarca										1			1				1
1116	Nephodia																								1
1120	Cnephora																								2	5	6	6	1
1122	Nephodia				1
1124	Isochromodes											1				1	1	1		1	4	4				1
1127	Lomographa		3	3	1
1128	Lomographa		1
1129	Lomographa												1
1130	Lomographa																										4
1131	Lomographa																							1	1	1	46	34	1
1132	Lomographa											1	4						1	1	4	17			7	1
1133	Lomographa																									1
1134	Iridopsis											2					6		1			1
1137	Iridopsis														2													1
1138	Iridopsis											3						1		1
1139	Iridopsis																										18	4
1140	Iridopsis		1
1141	Iridopsis																								2		4	4	9	7
1142	Iridopsis																											1
1143	Nephodia																										17	17
1144	Nephodia																										8	8
1145	Nephodia																									1	23	8
1146	Hagnagora																								1
1147	Hagnagora																				1	4			7	2	6	6	1	4
1149	Brabirodes															1	1
1183	Pherotesia									1
1423	Oospila									1
1504	Euphyia																					1
2004	Oxydia														1			1
2005	Sicya													1							1
2006	Sicya																	1
2008	Certima								1
2010	Nephodia																								1	1
2012	Pero									1
2017	Sphacelodes																		1	1							2	2
2023	Semaeopus																1
2026	Cyclophora"											1										2				1
2028	Astyochia												1														1
2029	Cyclophora"														1					1
2033	Nephodia																								2	2
2034	Sabulodes"			2								1			1
2036	Simopteryx																					1
2038	Pero																				1
2039	Fulgurodes											2	1
2040	Fulgurodes																	1	8	2		1
2044	Fulgurodes			1															1
2046	Microxydia							2					2	1	1	2	1	3	9	5	2		1
2051	Lissochlora											4	1		1
2052	Lissochlora									1		1
2055	Cidariophanes									1
2056	Astyochia																			2
2057	Cidariophanes											1
2058	Rucana				1
2059	Rucana																					1
2062	Semaeopus								1
2063	Nephodia											1												1
2064	Nephodia																	1
2066	Melanolophia			2
2068	Berberodes			1
2069	Minyolophia			1
2070	Mychonia									1
2073	Eustenophasma											1	2
2074	Eustenophasma																		1
2075	Eustenophasma											1	1
2080	Certima		1	1
2081	Lomographa											1	9		2	3			1	1		3	1	1
2083	Eupithecia		1
2085	Anisoperas								1
2086	Cyclophora"																					1
2087	Lomographa																	1	1		19
2088	Herbita									1	1
2090	Apiciopsis																										1
2091	Heterusia																	1
2094	Callipseustes																1
2101	Physocleora											1	1						2
2111	Eupithecia																					1			1	1		1
2113	Graphidipus																									2
2122	Pero			1	1
2124	Nephodia													1				3
2125	Nephodia									1
2129	Eois										1
2131	Eois			1
2133	Eois						1											1
2134	Psaliodes											1
2136	Psaliodes																				1
2137	Eupithecia														1											1
2139	Eupithecia																								2			1		1
2146	Eupithecia																				1
2149	Psaliodes																	1					3		2
2150	LARENTIINAE																										1
2151	LARENTIINAE											1
2153	Rhinura													1
2155	Euphyia									1
2156	Euphyia															1
2160	Idaea									1		2	5
2162	Neazata																				4	6
2167	Glena																					1
2171	Dyspteris																										1	1
2172	Rhopalodes																												1
2173	Rhopalodes																				3
2174	Rhopalodes																								1	1	1	3	1
2175	Hydriomena																						1	1	8	2			2
2176	Hydriomena																										1	1
2177	Hydriomena																										1
2178	Hydriomena																								1		2	1
2179	Hydriomena																								1
2180	Hydriomena																								1
2181	Hydriomena																									1
2182	Hydriomena											1	1		1		1	1
2183	Phyllodonta		4	3	1			2										1
2184	Phyllodonta		5									2	1					2			1
2186	Chloropteryx																								1		6	1
2187	Lissochlora																								1	2	9	18	1
2188	Lissochlora																	1							8	4	1	2
2189	Lissochlora																										13	4
2190	Isochromodes																										13	12
2191	Isochromodes																										3	1
2192	Isochromodes																			1			4			1
2193	Isochromodes																				5	8			1		1	1
2194	Isochromodes											1										6
2195	Isochromodes																								6		1
2196	Isochromodes			1
2197	Mychonia															1							1			2	12	2
2198	Eustenophasma																									1	16	1
2199	Certima													1					1						2	2	16	11
2200	Certima			1
2201	Certima																										1	2
2202	Certima																	1	1								3	2	1
2203	Certima													1												2
2204	Melinodes																										26	13		1
2205	Eois																						1	1	7	7	6	14
2206	Eois																							1	3	1		2	4	3
2207	Eois																							1			33	46	9	2
2208	Eois																						1	1		1
2210	Eois																										10	13
2211	Eois															1									2
2212	Eois																										1
2214	Eois															1							2					1
2216	Eois				1					1
2217	Eois																										14	29	4	4
2218	Eois																										3
2219	Eois																										1	3
2221	Eois			1											2	10
2222	Eois																							1			4	3	2
2223	Eois																								2		15	19
2224	Eois																										25	27	34	5
2225	Eois																										20	17
2226	Eois																										1
2227	Eois																							1	2		2	3	1
2228	Eois		1							3
2229	Eois		8	2				1								1
2230	Eois			1
2231	Eois											1									1					2
2232	Eois																										1	1
2233	Eois																								1	3	10	7	2
2234	Eois																										3	5	1
2235	Eois																				1			4	4	2	102	16
2236	Eois																									1	2	1
2237	Eois											1	1	1		1				1					1
2238	Eois																	3
2239	Eois																3	7	2	3
2242	Eois																										9	7
2243	Eois									1
2244	Eois																					1
2247	Eois			1				1
2248	Eois										1
2250	Eois			1				1	1
2251	Eois		1	1
2252	Eois																											1
2254	Eois																									1
2255	Eois			1
2258	Eois																									1		1		1
2260	Eois																							1			1
2261	Eois			1
2263	Eois			1					2			1						1
2264	Eois		2	1	1
2265	Eois																										9	11	1
2266	Eois																									1
2267	Eois														1
2268	Eois									1
2269	Eois			2				2
2270	Eois											2
2272	Eois																		1		5	2
2273	Eois			2
2274	Eois		1
2275	Eois			1
2276	Eois																								1	1	2	5
2279	Eois																										1	1
2280	Eois																					1
2281	Eois										1
2283	Eois																										6	2
2285	Eois											1
2286	Eois																			1
2287	Eois														3
2288	Eois																										2		2
2291	Eois									1
2292	Eois																										1	3
2293	Eois															1									1
2294	Eois																	1
2295	Eois																										3	3
2300	Eois																										4	2
2301	Eois																										12	12		1
2302	Eois											2	1				1
2304	Eois																						1	1		1
2305	Eois																								1		8	9	1
2306	Eois																									1
2307	Eois																										1	1	2	1
2308	Eois																										3		1	1
2309	Eois																										2	1
2311	Phaludia		1
2313	Eois		1
2314	Eois														1	1			1
2315	Eois			1		2
2316	Eois																	1
2317	Eois		1	5	1					1
2318	Eois												1					1
2319	Eois		2
2320	Eois		1
2322	Eois		2	14				1	1	1
2324	Eois							1
2326	Eois			1	1
2327	Eois																												1
2328	Eois																										1	3
2329	Eois		4	1	1					2
2331	Eois												1		1
2332	Eois																1	3	13	12
2333	Eois																				3	2
2335	Eois																										31	66
2336	Eois													1
2337	Eois									1		1
2338	Eois																			2
2340	Eois			1														1
2342	Eois									1
2343	Eois		1
2344	Eois		1			1									1
2345	Eois																										2
2346	Eois																				1				1
2347	Eois																	1
2348	Eois											1	1			1		6									1
2350	Eois			2
2351	Eois									1		1
2352	Eois		1
2353	Eois																										43	30
2354	Rucana			1
2355	Eois																	1		1
2356	Eois											6	1				1	2										1
2357	Eois								1
2358	Eois								1
2360	Eois											2	2
2361	Eois																								1		4	1
2364	Opisthoxia					1
2367	Opisthoxia																	1	1	1
2368	Opisthoxia									1
2369	Opisthoxia									1
2370	Opisthoxia						1
2371	Argyrotome		11	11	3	10	2
2372	Pityeja														2				2						1
2373	Pityeja																										1
2374	Nazca															2		2	4	6
2375	Aragua																							1		2	4	5	1
2376	Aragua																										3	1
2377	Aragua															2		1		2	3	5
2378	Aragua																										1	1
2379	Astyochia		1	1
2381	Leucula														1		1					1
2383	Nephodia																							1			3	1
2384	Nephodia																								3	10
2385	Nephodia																										2	3
2387	Nephodia																										7	6
2388	Nephodia																								3	1
2389	Nephodia																							1			3	1	1
2390	Nephodia																									1	1	6
2391	Nephodia											1					1		1	1
2392	Nephodia																			1
2393	Nephodia			1
2394	Nephodia											1		1
2395	Nephodia		1	1									1				1	4
2396	Nephodia							2	1	3								1
2397	Nephodia																	1
2398	Nephodia									1			1			1			2			2
2399	Nephodia		2
2401	Nephodia			2
2402	Nephodia		1
2404	Nephodia																				1		1
2405	Nephodia																		1
2407	Nephodia			1
2410	Nephodia											2	1								1
2411	Nephodia											2	4			2					1
2412	Nephodia																					1
2413	Leucula																										1	1
2414	Leucula																										2	1
2415	Nephodia																											1
2416	Leuciris		1	1
2417	Berberodes		1
2420	Pero												1
2421	Pero																					2			1		1	3
2422	Pero																								1
2424	Pero			1	2
2425	Pero			1			1		3	4	1
2426	Pero			1						1
2427	Pero											1
2428	Pero			1
2429	Pero				1
2430	Pero																								1
2431	Pero		1													1
2432	Pero									1
2433	Pero			1
2434	Pero							1
2435	Pero		1	1
2436	Pero																						4		1		3	1
2437	Pero											1								2					2		4	1
2438	Pero																						1				5	2
2439	Pero																						2	1	1	1	32	20	4
2441	Pero																										1	1
2442	Pero																										1	2
2443	Pero																									2	2	1
2444	Pero																													1
2445	Pero																										2	2	1
2447	Erateina																										1
2448	Cophocerotis																												1	5
2449	Triphosa																													1
2450	Cophocerotis																				1
2451	Deinoptila																					1
2452	Deinoptila																								1			1
2456	Nacophorini																	1
2457	Triphosa																													1
2462	nn lare																										4
2464	Graphidipus																												1
2465	Rhopalodes																										1	2
2466	Euphyia																								2	1
2467	Euphyia																						1			1	5	2
2469	Euphyia																										34	21
2470	Euphyia																											1
2471	Euphyia														1				1
2472	Euphyia																		1
2473	Euphyia																										4	3
2475	Euphyia																													1
2476	Euphyia																								1		1
2477	Euphyia																	1
2478	Hydriomena														1												3	2
2479	Hydriomena																											1
2480	Hydriomena																								2				3
2481	Hydriomena																												1	1
2482	Hydriomena																													1
2483	Hydriomena																											1
2484	Hydriomena														1
2485	Hydriomena																												1	2
2486	Hydriomena											3
2487	Perizoma																										4	5		4
2488	Euphyia																										2		1
2489	Euphyia																											1	1
2490	Euphyia																										1
2491	Hydriomena												1
2492	LARENTIINAE																												1
2493	Euphyia																										3	9	1
2494	Euphyia																						1					3
2495	Euphyia			1																									1
2496	Euphyia												1
2497	Euphyia																										2
2498	Euphyia																										2
2499	Euphyia																											1
2500	Euphyia																					1			1		1
2501	LARENTIINAE																										1
2502	LARENTIINAE																									1
2503	Euphyia								1
2504	Euphyia																										1	1
2505	Spargania																										1
2506	Spargania																										1	2
2507	Spargania																										1		1
2508	Hammaptera												1
2509	Hammaptera												1			1			2
2510	Phyllodonta																	1				1			1			1
2511	Euphyia			1
2513	Spargania												1							1
2514	Spargania											2			1
2516	Distroneura																				1	1
2518	LARENTIINAE																										1	1
2520	Euphyia																										2	2
2521	Euphyia																										2
2523	Rhinura																							1	2		1
2524	Rhinura																										1
2525	Euphyia																										1	1
2527	Cimicodes																		1		1	1
2528	Cimicodes											1						1	4
2529	Cimicodes		4	2	1
2530	Cimicodes			1							1
2531	Cimicodes																				1					1	4	4
2532	Furcijuxta					1
2533	Furcijuxta																											1
2534	Cirsodes																										1	3
2535	Certima																										3	4
2536	Cirsodes																										1	5
2537	Cirsodes																											1
2538	Cirsodes																					1
2539	Certima																										1
2540	Certima																										1	1
2541	Certima																										1
2542	Certima																		1						5
2543	Certima			1
2544	Certima																										2
2545	Herbita																										2
2546	Certima											2	4		4	2			1	1	2				1
2547	Certima																								1		1	2
2549	Herbita									1
2550	Herbita																								8	2
2551	Herbita												1
2552	Psaliodes			1
2553	Certima																	1							1
2554	Bonatea		6	1	1	2			2
2555	Prochoerodes		1					1
2556	Prochoerodes							2	1	1
2557	Prochoerodes				1					2		1				1	1	6
2558	ENNOMINAE																											1
2559	ENNOMINAE																										3
2560	Tmetomorpha		2	1
2561	Cnephora																										1	4	1
2562	Herbita		1	3	4			1
2563	Herbita																										15	3
2564	Phyllodonta																				3		3		2	5
2565	Herbita																						2	1	2	2	1
2566	Herbita																						1
2567	Herbita																										1
2568	Herbita			1																							3
2569	Phyllodonta																											1
2570	Pyrinia																											1
2571	Pyrinia															1												1
2572	Pyrinia			1					1
2573	nn							1
2574	nn			1	1			1
2575	Psaliodes																								1
2576	Pyrinia			1						1								1
2577	Oxydia																											2
2578	Oxydia																								2	2		1
2579	Oxydia																										38	17	1
2580	Oxydia											2	2	2				3	7	3						1
2581	Oxydia																										1	1	1
2582	Oxydia																						3	1			15	18
2583	Oxydia			2		1		1	3	4	1
2584	Oxydia											1		7
2585	Oxydia																								2	1	1	1	1
2587	Oxydia									1								1			2				1
2588	Oxydia			2	1													1
2589	Macaria																		1			4
2590	Macaria																								1
2591	Macaria						1			1
2592	Macaria																		1			1			1
2593	Macaria		2	6	1			2	1
2596	Eois																												1	1
2598	Eois																		1	1
2599	Eois																					1			1
2600	Eois										1
2601	Eois			1
2602	Charca																										1
2603	Eusarca			1																								1
2604	Physocleora											3	2					16	2	5	1
2605	Physocleora						1					6	5				7	35	5	34	12	6
2606	Psaliodes										1
2608	Eois			1				1	1			1
2609	Eois		2	4	1
2613	Eois																											2
2614	Eois														1			2	3
2615	Eois																											1
2616	Eois																											1
2617	Eois																											1
2618	Eois																	1
2619	Rucana											1					2	5		4
2620	Rucana																	1
2621	Rucana																								1
2622	Rucana									2
2623	Charca																	1				1
2624	Charca			1
2625	Charca				1	1
2626	Mallomus																										1	1
2627	Mallomus																										1
2628	Mallomus																												1
2629	Charca																										1		1
2631	Eois		1																3
2632	Callipia																										1		1	3
2633	Callipia																									1	2	1
2635	Cargolia										1		1					1
2636	Cargolia																				1		2	1	3	4
2637	Cargolia																									1	7	1	1
2638	Cargolia																								1
2639	Cargolia																												2
2640	Cargolia																						1		8	6	11	17	1	2
2641	Cargolia																								2		23	7	1
2642	Rhodochlora												1						14	1		1
2644	Rhodochlora														1										1
2645	Rhodochlora																										2
2646	Rhodochlora																				1
2647	Rhodochlora																											1		1
2648	Rhodochlora			2				1
2649	Phrudocentra		1
2650	Phrudocentra																				1
2652	Oospila			1				1
2653	Chavarriella			2
2654	Eois																								1
2659	Sicya			1						1
2660	Apiciopsis																										1	2
2661	Cosmophyga																					5					1	10
2662	Neodora																										7	4
2663	Bonatea														1						7			1		2
2664	Bonatea																			1	1			1
2665	Bonatea															1				1	5	6	3	2	4	5
2666	Bassania																										1	2
2668	nn Oenochrominae			1
2669	nn Oenochrominae			1
2671	Bassania																										5	4	1
2672	Bassania																						2	2		1	25	19		1
2673	Ophiogramma			1
2674	Hygrochroma			1
2675	Dolichoneura			1				1
2676	Racasta			1											1				1			1
2677	nn Oenochrominae			1
2678	Isochromodes																								1			1
2679	Isochromodes																											1
2682	Hypometalla			2	1	4	4	1
2683	Phaludia			1
2684	Phaludia		1
2685	Patalene									1
2686	Patalene			1
2690	Nemoria		1					2	1
2691	Nemoria			1					2
2692	Synchlora		1
2693	Synchlora																								1	1
2694	Cyclophora		1									1	2
2695	Eupithecia											1	3	1					1	1		2
2697	Eupithecia			1	1			1
2699	Synchlora																										3	1
2700	Synchlora									1
2701	Synchlora		1	2
2702	Synchlora			3				1		2	1
2703	Synchlora				1																					1
2704	Hydata																				1
2705	Hydata																										2	3
2706	Hydata																		1
2707	Hydata			1
2708	Hydata											1
2709	Hydata																					1
2710	Hydata											1	1						1						1	1
2711	Lissochlora																						5		2	6	2	2
2712	Lissochlora																									1
2713	Lissochlora		5				2
2715	Lissochlora		3	2
2717	Lissochlora																										2	5
2718	Lissochlora																										2	3
2719	Lissochlora																											1	1
2720	Chloropteryx		4	1		1		1											1
2721	Chloropteryx		1			1
2722	Chloropteryx																											1
2723	Chloropteryx		1	1		1	3	2	1
2724	Oospila		1	4			1	1
2725	Lissochlora											1			2							1
2726	Lissochlora									3		6	6								2
2727	Lissochlora											1									1
2728	Lissochlora																							1	4	3	1
2729	Lissochlora																										5	6
2730	Lissochlora																								1				3
2731	Lissochlora		6	2	1			3
2732	Lissochlora		1	1
2733	Lissochlora							1		2
2734	Lissochlora											1				1			1	1	1
2735	Lissochlora												1
2736	Nemoria											1	1					1	2
2737	Nemoria									1
2738	Nemoria																										1	2
2739	Nemoria														1
2740	Nemoria											1
2741	Nemoria																								1		2	4
2742	Psaliodes																								1
2744	Psaliodes																						2		1
2746	Psaliodes																					1
2747	Psaliodes							1
2748	Psaliodes												2		1			1
2749	Psaliodes										1
2750	Psaliodes																	1
2752	Psaliodes																										7	6
2753	Psaliodes																										4	1	1
2754	Psaliodes																										1
2756	Psaliodes															1									1
2757	Psaliodes			1
2758	Psaliodes																											1	1
2759	Psaliodes																										1		2
2760	Psaliodes																				1
2761	Psaliodes																			1
2762	Psaliodes														1
2763	Psaliodes																					2
2764	Psaliodes																	1
2765	Psaliodes																										6
2766	Psaliodes																		1
2768	Psaliodes																											1
2770	Psaliodes																												1	1
2771	Psaliodes																										5	3
2772	Psaliodes																												1
2773	Perizoma																								5	7	1	1		1
2774	Perizoma																									3		1
2775	Perizoma																												1
2776	Perizoma																		2
2777	Perizoma																		1
2778	Psaliodes		1	1
2779	Psaliodes																								1
2780	Psaliodes																				1
2781	Perizoma									1									2	1		1
2782	Perizoma																										2	4
2783	Psaliodes																		1
2784	Psaliodes																					1			4	3	9	9
2785	Psaliodes																									1
2786	Psaliodes																									1	4	1	1
2788	Psaliodes																										3
2789	Psaliodes																					1
2790	Psaliodes												1
2793	Nephodia									1
2794	Psaliodes																											2	1
2795	Psaliodes																				1
2796	Psaliodes											2
2797	Psaliodes																											1
2798	Psaliodes																							1					2
2799	Psaliodes																									1
2801	Psaliodes														1
2802	Psaliodes																										1	1
2804	Psaliodes																								1
2805	Psaliodes																								1
2807	Psaliodes																			1
2808	Psaliodes																									2	2	1
2809	Psaliodes																									1
2810	Psaliodes														2			1	1	2		2
2811	Psaliodes																								1
2812	Psaliodes																									1
2813	Psaliodes		1
2814	Psaliodes																		1
2816	Psaliodes																	1
2817	Psaliodes																											2
2818	Psaliodes																								5	2	1
2819	Psaliodes			1	1
2820	Psaliodes																								1	2
2821	Psaliodes																									1
2822	Psaliodes																								4	1
2823	Psaliodes																					1
2824	Psaliodes																								1		1	3
2825	Psaliodes		3	6	4
2826	Psaliodes											1	1						2		1	1				1
2827	Psaliodes																										2	4
2828	Psaliodes																				1
2829	Psaliodes																				1
2830	Psaliodes																											1
2831	Semaeopus		5
2832	Semaeopus		1					1
2833	Semaeopus		1
2834	Semaeopus				1
2835	Semaeopus		1
2836	Semaeopus		1
2837	Semaeopus		2	2
2838	Idaea									1	1
2839	Idaea						1
2840	Idaea												2
2841	Idaea											1
2842	Idaea					1		1
2843	Idaea		1	2			1			1	1
2844	Idaea			3	1	2	3			1	1
2845	Dithecodes			2	1				1
2846	nn		1	1	1	1	1	3
2848	Idaea		1	14	1	2	14				1
2850	Idaea			1	1
2851	Idaea			1
2852	Idaea				1
2854	Cyclophora																										4	1	2
2855	Cyclophora			1
2856	Cyclophora				1			1	1
2860	Cyclophora																	1
2861	Cyclophora																										1	3
2862	Cyclophora									1
2863	Cyclophora														1						1
2864	Cyclophora																								1
2865	Cyclophora																											1
2867	Cyclophora		1
2868	Cyclophora															1									1
2869	Cyclophora																											1	1	1
2870	Cyclophora																								1	1
2871	Cyclophora															2	1				1	2	1			1
2872	Cyclophora		1
2873	Cyclophora		3	2
2875	Melanolophia																										4	2
2876	Melanolophia			1
2877	Bryoptera																						2
2878	Bryoptera																					2
2879	Bryoptera			1				1
2880	Melanolophia									1
2882	Melanolophia																								1	2	3	1
2883	Melanolophia									1
2884	Odysia																					1				1
2885	Melanoscia																								3		3	4
2886	Melanoscia																				1
2888	Bryoptera																						1
2889	Stenalcidia											1						2		3
2890	Stenalcidia									1
2891	Stenalcidia		1							1
2892	Stenalcidia						1	1
2894	Nephodia																										1
2895	nn 'Sabulodes'																	1		1
2896	nn 'Sabulodes'																						1		1		1
2897	nn 'Sabulodes'																								1
2898	nn 'Sabulodes'																											2		1
2899	nn 'Sabulodes'														1
2900	Mimomma		4	9	1	1	3
2902	Isochromodes		1																	1
2903	Campatonema				1
2904	Perusia																										1	2
2905	Nephodia		4	3	2	1			1					1
2907	Nephodia									1		1
2908	Nephodia																		1		1				1
2909	Nephodia													1					1
2910	Nephodia		1	2
2911	Nephodia											1	2
2913	Oenoptila																									2	1
2915	Oenoptila																											1
2916	Oenoptila																								2
2917	Eupyhia																		1
2918	Dyspteris			1
2919	Glena			2
2920	Glena		1	3
2922	Mimosema														1							2			1	2
2923	Mimosema												1
2924	Mimosema																		1	1
2925	Patalene											1									1	2
2926	Mesedra																									1	5	2
2928	nn																										1	2
2929	Isochromodes			1							1		1
2930	Isochromodes							1		1		1		2		1					1		1		1
2931	Isochromodes			1
2932	Isochromodes											1		1
2933	Isochromodes												1					1
2934	Isochromodes																								1
2935	Isochromodes			1												1	1
2936	Isochromodes																							1	2
2937	Isochromodes																					1
2938	Isochromodes																									1
2939	Isochromodes										2
2940	Isochromodes																				1
2941	Isochromodes																									1	1
2942	Isochromodes		2	2			1	1
2943	Isochromodes																								2	2
2945	Isochromodes		1	1
2946	Isochromodes			4
2947	Isochromodes																										1	1
2948	Isochromodes																						1			1		1
2949	Isochromodes															1		1
2950	Isochromodes								1				1
2951	Nematocampa						1			1
2952	Perusia																										8
2953	Perusia			2
2954	Microxydia		2	1	1		1
2955	Microxydia																		1		1
2956	Iridopsis			1	1
2957	Iridopsis			1
2958	Iridopsis		1										1							6	2	3
2959	Iridopsis																	1
2961	Physocleora																							1		1	3	3
2962	Physocleora		3	8	5	6	6	2	1												1
2963	Physocleora				1	1		1
2964	Physocleora																	1	2	4		2					1
2965	Physocleora			1
2966	Physocleora		3
2967	Physocleora			1
2969	Physocleora		2	4
2971	Physocleora			1	2
2972	Physocleora																			1
2973	Physocleora																				1		1	1	10	6	3	3
2974	Physocleora																								2		3	1
2975	Physocleora																										1
2976	Physocleora									1
2977	Physocleora					1					1	3	2
2978	Physocleora		4	2
2979	Physocleora			2			1
2980	Physocleora																		1	1	1	2
2981	Melinodes																			1							1
2982	Melinodes																										7	1
2983	Melinodes											1						3
2984	Apiciopsis																										12	11
2985	Melinodes																										1
2986	Melinodes									1
2987	Periclina																										1
2988	Periclina																										1	1
2989	Eusarca																										7	5	3
2990	Eusarca																										1
2992	Oenoptila																					1						1
2993	Oenoptila																				2	1
2994	Oenoptila																											2
2995	Oenoptila																													1
2996	Perissopteryx																				1	1			1	1
2997	Perissopteryx		1	1				1	2	1
2998	Perissopteryx							1
2999	nn enno																										1	1
3000	nn enno																										1	1
3001	nn enno																		1	4				1				1
3002	nn enno																										3
3003	nn enno																						1	1			1		1
3004	nn enno																													1
3005	Isochromodes																										1
3006	Isochromodes																													1
3007	Bonatea																	1
3009	Eutomopepla																								2	1	3	1
3010	Simopteryx															2
3011	Simopteryx										1
3013	Oenoptila													1
3014	Cimicodes								1
3015	Bassania											1
3016	Oxydia																	1
3017	Oxydia																											1
3019	Nephodia									1
3021	Astyochia											1	1
3022	Nephodia																										1	2
3023	Nephodia																										4	3
3024	Nephodia		1
3025	Nephodia																										1
3026	Nephodia																	1
3027	Nephodia										1
3028	Nephodia																		1
3030	Nephodia			1
3031	Nephodia																					1
3033	Perusia																		4
3035	Perusia																										1		1	1
3036	Perusia		1
3038	Neazata			2
3039	Lomographa														1
3040	Lomographa							1		1
3041	Eustenophasma		1
3042	Eustenophasma																												1
3043	Nematocampa		2		1			1
3044	Microxydia															1						1
3045	Anisoperas			2
3047	Mesedra																		2
3049	Mesedra																								1
3050	Aenictes		1
3051	Thysanopyga				1
3053	Perissopteryx																								1
3054	Oenoptila																								1					1
3055	Oenoptila																								1
3056	Oenoptila																									2	2	3
3057	Oenoptila																										1	1
3058	Petelia																								1	1
3059	Petelia																											1
3060	Petelia		2	1				1
3061	Petelia																					3			1
3062	Petelia																									1
3063	Oospila						1
3064	Hydata														1
3066	Mallomus																										1
3067	Mallomus																										2
3068	Idaea			4		3	3
3069	Idaea			1					3
3070	Idaea												1
3071	Idaea					1
3072	Idaea											3										1
3073	Idaea												1									1						1
3074	Idaea			2	1
3075	Idaea																			1
3076	Idaea		1										1
3077	Idaea						1	1
3078	Idaea		1
3079	Idaea							1
3080	Idaea																					1
3081	Idaea			1	1
3082	Idaea										1
3083	Idaea			2		1	4			3	1
3084	Idaea			2		1	3			1	1
3085	Idaea			2			1
3086	Idaea									1			1
3087	Idaea			19	11	2	4	2			1					1			1
3088	Cyclophora																										1	2
3089	Idaea										1
3091	Euacidalia									1
3092	Semaeopus																1
3093	Scopula		2	2		1		1
3094	Scopula											2
3095	Scopula			1
3096	Tricentra			1	1
3097	Psaliodes																													1
3098	Tricentra			2
3099	Tricentra				1
3100	Tricentra				1
3101	Tricentra		1							1
3102	Tricentra			1
3103	Leptostales				1			1	2
3105	STERRHINAE			1
3106	Leptostales			1
3107	Leptostales									1
3108	Leptostales			1				2
3109	Leptostales			1		1		2	1
3110	Pleuroprucha		1	1
3111	Cyclophora		1	1
3112	Cyclophora																				1
3113	Cyclophora		1	1
3115	Cyclophora																				1
3116	Cyclophora												3									1
3117	Cyclophora			1													1
3118	Nephodia																										1
3119	Eupithecia														1
3120	Eupithecia																								2			1	1
3121	Eupithecia																										1			1
3122	Eupithecia											2	2								2	1
3123	Eupithecia																											1
3124	Eupithecia																									1
3125	Eupithecia																											1
3126	Eupithecia																											1
3127	Eupithecia															2			1		1	1		1	12		1	1
3128	Eupithecia																				1	1				1
3129	Eupithecia																					2
3130	Eupithecia												1														1
3132	Eupithecia											1
3133	Eupithecia																				1
3134	Eupithecia															1
3135	Eupithecia									1
3137	Eupithecia																										5	6
3138	Eupithecia																					1					1
3139	Eupithecia																					2		1		1
3140	Eupithecia																									1
3143	Eupithecia																				1		1	2			23	9
3144	Eupithecia																								1		1		1
3145	Eupithecia																1
3146	Eupithecia												1					1				1
3147	Eupithecia										1
3148	Eupithecia									1
3151	Eupithecia											1	1
3152	Eupithecia																								1				1
3153	Eupithecia																								1	1
3154	Eupithecia																							1		1	2	3
3155	Eupithecia					1			1
3156	Eupithecia												2
3157	Eupithecia																											1
3158	Eupithecia			1
3159	Eupithecia															2	1	4								1
3160	Eupithecia																					1
3161	Eupithecia												1
3162	Eupithecia		1	1						1							1
3163	Eupithecia			1
3164	Eupithecia		1	1
3165	Eupithecia																						1			1	2	2
3166	Eupithecia											1
3167	Eupithecia			1								3	13		1		1		1	1
3168	Eupithecia																						1		1	1
3169	Eupithecia																							2	1	1	10	2
3170	Eupithecia																										2	4	1
3171	Eupithecia																										4	10	1
3172	Eupithecia																												2	1
3173	Eupithecia										1	1	1								4	1
3174	Eupithecia											3	2
3175	Eupithecia						1		1
3176	Eupithecia																							1		1
3177	Eupithecia										1
3178	Eupithecia																								1	1
3179	Eupithecia																					1			1
3180	Eupithecia			1								2	1
3181	Eupithecia			1	1		1
3182	Eupithecia											1
3183	Eupithecia											2												1
3184	Eupithecia																								2		1	1
3185	Eupithecia																								3	1		1
3186	Eupithecia																								1		1
3187	Eupithecia																							1	1		3	11		1
3188	Eupithecia																						1	1			2		1	9
3189	Eupithecia																								1		4	5
3190	Eupithecia											1			1
3192	Eupithecia																										2	2
3193	Eupithecia																										1	1	1
3194	Eupithecia																	1					1
3195	Eupithecia																	1							5	2	2		1
3196	Eupithecia											14	3			3		3	1	2	2				2	1
3197	Eupithecia																					1				1	11	5
3198	Eupithecia																								1		1	2
3199	Eupithecia																										1
3200	Eupithecia														1									2				1
3201	Eupithecia																										5	5	3	1
3202	Eupithecia																		2			1	1		1	2
3203	Eupithecia															1					2
3204	Eupithecia																									1
3205	Eupithecia															1								1	1	1
3206	Eupithecia														1						4	4				1
3207	Eupithecia																				1
3208	Eupithecia																											1
3209	Eupithecia																												2
3210	Eupithecia												1								1				1	1		1	3	1
3211	Eupithecia		1	1																	2	1	1	4	20	10	1	6	2
3212	Hydriomena																													1
3213	Hydriomena																									1		2	1
3214	Eupithecia																										1	10
3215	Eupithecia																					1
3216	Eupithecia																							2	3		5	5
3217	Eupithecia																							2	2	2	1	1	1
3218	Eupithecia																										2	1
3219	Eupithecia																											2	1
3221	Eupithecia																					1		1	6	1	16	23		6
3222	Eupithecia																								1		1	2	1
3223	Eupithecia																								3		1
3224	Eupithecia																										3	3
3225	Eupithecia																								2		13	20
3226	Eupithecia																							1			5	12	1
3227	Eupithecia																								2		11	12	4	2
3228	Eupithecia											1				1					1		1	1	8	5
3229	Eupithecia												1			6		4			1	2		2	2	5		1
3230	Eupithecia															1		1	1	1		3		1			2	1
3231	Certima																1
3232	Certima																						1
3235	Isochromodes															1												2	1
3236	Psaliodes																		1
3237	Psaliodes																	1
3238	Psaliodes																			1
3241	Euphyia																											1
3242	Euphyia																	1
3243	Nemoria																										2	1
3244	Bryoptera		2							1
3245	Dyspteris			1
3246	Phaludia																1
3247	Neazata			1
3249	Trichozoma																	1
3250	Nephodia																								1			1
3251	Nephodia		1		1
3253	Nephodia																								1	1
3254	Nephodia																										2	5
3255	Lissochlora											1
3257	Physocleora									1
3258	Physocleora												1
3259	Isochromodes									1
3260	Isochromodes																				1
3261	Ophiogramma		1
3262	Nemoria											1	1								1
3263	Cyclophora																										1	2	1
3264	Cyclophora																								1			1	1
3265	Spargania																								1
3267	Hydriomena																										1	1
3268	Cartellodes									1	1
3269	Patalene			1
3270	Idaea									1
3272	Idaea				1
3273	Eupithecia																											2
3274	Eupithecia																								1
3275	Eupithecia											1
3277	Eupithecia											1
3278	Eupithecia																								1
3279	Idaea			1
3280	Perusia																											1
3281	Nephodia																										1

## Sheet: Diversity
Diss code	Site code	Elevation	bias corrected Shannon	SE	Coverage	Shannon classic	Fisher's alpha	ES(cov=0.8)	Species	Specimens	Evenness J'
	First study
1a	19	1020	93.7	17.4	0.799	65	70.5	149.72	135	408	0.851
1b	20	1025	117.4	25.6	0.873	94.5	107.7	201.55	248	969	0.825
2a	21	1380	136.2	26.9	0.846	104.7	101.7	187.02	200	625	0.878
2b	22	1380	146.4	15.6	0.795	104.9	98.6	159.89	158	391	0.919
3a	1	1800	186.8	30.1	0.761	120.8	129.3	240.21	204	497	0.901
3b	8	1800	153.2	42.3	0.818	99.7	123.1	219.74	226	649	0.895
4a	9	1850	121.3	51.4	0.76	78.6	109	253.23	183	475	0.838
4b	2	1875	166.9	38.5	0.721	111.9	118.2	215.45	171	384	0.87
5a	3	2005	155.4	18.8	0.827	114.2	104.5	195.51	202	618	0.893
5b	10	2005	206.7	26.3	0.734	126.5	130.6	257.21	190	429	0.923
6a	4	2112	150.7	18.7	0.872	120.3	98.7	168.43	216	782	0.891
6b	11	2113	158.3	19.3	0.791	111.8	110.2	186.54	178	444	0.91
7a	12	2180	169.1	20.1	0.89	139.5	125.4	205.55	296	1203	0.868
7b	5	2212	181	16.2	0.902	151	115.2	200.86	273	1117	0.894
8a	13	2290	130.1	18.8	0.848	100	95.1	166.7	200	684	0.869
8b	6	2308	117.1	32.4	0.773	78.6	84.8	170.58	145	384	0.877
9a	7	2375	142.1	14.5	0.862	111.6	93.6	161.35	203	725	0.888
9b	14	2387	164.5	18.8	0.88	132.9	114.9	194.13	259	980	0.88
10a	15	2524	150.3	18.3	0.847	116.8	99.1	160.46	193	596	0.905
10b	16	2558	197.4	20.2	0.762	131.8	126.5	217.91	191	446	0.929
11a	17	2671	139.1	13	0.841	107	89	144.05	164	473	0.916
11b	18	2677	163	15.8	0.847	125.6	104.5	174.97	208	660	0.906
	Second study
	19	1020	177.2	24.8	0.784	120.6	124.5	228.19	214	570	0.893
	20	1025	225.7	50.9	0.777	150.3	180.8	341.15	313	840	0.872
	40+41	1125	105.9	23.4	0.702	59.9	66.1	138.98	94	208	0.901
	48+49	1278	217.2	35.3	0.637	126.2	162	243.11	168	295	0.944
	45+46	1500	407.7	71.2	0.527	166.7	254.5	398.3	205	315	0.961
	1	1800	241	40.4	0.77	158.4	172.9	336.6	289	747	0.894
	8	1800	157.4	26.7	0.808	109.9	122.2	224.32	238	735	0.859
	33+34	1879	258.7	46.7	0.696	147.8	171.3	313.27	228	477	0.92
	30+32	1982	269.3	38.1	0.763	178.1	185.6	344.88	298	739	0.91
	38+39	2138	198.6	20	0.863	155.8	137.4	226.47	288	980	0.892
	12	2180	230.7	20	0.824	171.3	154.5	262.4	293	875	0.906
	5	2212	217.6	20.5	0.851	168.7	149.5	246.3	303	985	0.898
	60+61	2610	209.1	31.3	0.697	128.9	147.3	230.44	181	356	0.935
	17	2671	289.4	20.7	0.836	216.6	184.7	308.3	358	1098	0.915
	18	2677	269.7	26.2	0.799	188.9	179.3	308.22	307	814	0.915
	50	2897	197.1	17.9	0.927	172.1	134.9	201.58	376	2054	0.868
	51	2916	211.6	22	0.913	180.3	146.2	223.7	379	1808	0.875
	70+71	2980	74.1	37	0.787	49.8	77.8	193.3	147	437	0.783

## Sheet: Blatt3
Second study	Elevation
